# Supplementary material for: Positional Cloning of the Flowering Time QTL qFT12-1 Reveals the Link Between the Clock Related PRR Homolog With Photoperiodic Response in Soybeans
Source: Front Plant Sci. 2019 Oct 15;10:1303. doi: 10.3389/fpls.2019.01303 (PMC6803524; doi:10.3389/fpls.2019.01303)
Supplement: Supplementary file 4 [file Table_2.xlsx]

## Sheet: Sheet1
A2YQ93.2_OsPRR37	A2YQ93.2 RecName: Full=Two-component response regulator-like PRR37; AltName: Full=Pseudo-response regulator 37; Short=OsPRR37
Q0D3B6.1_OsPRR37	Q0D3B6.1 RecName: Full=Two-component response regulator-like PRR37; AltName: Full=Protein DAYS TO HEADING 7; AltName: Full=Protein HEADING DATE 2; AltName: Full=Pseudo-response regulator 37; Short=OsPRR37
A2XFB7.2_OsPRR73	A2XFB7.2 RecName: Full=Two-component response regulator-like PRR73; AltName: Full=Pseudo-response regulator 73; Short=OsPRR73
Q10N34.1_OsPRR73	Q10N34.1 RecName: Full=Two-component response regulator-like PRR73; AltName: Full=Pseudo-response regulator 73; Short=OsPRR73
Q93WK5.1_PRR7	Q93WK5.1 RecName: Full=Two-component response regulator-like APRR7; AltName: Full=Pseudo-response regulator 7
Q9LVG4.1_PRR3	Q9LVG4.1 RecName: Full=Two-component response regulator-like APRR3; AltName: Full=Pseudo-response regulator 3
Q9LVG4.1_PRR3	Q9LVG4.1 RecName: Full=Two-component response regulator-like APRR3; AltName: Full=Pseudo-response regulator 3
Q6LA42.2_PRR5	Q6LA42.2 RecName: Full=Two-component response regulator-like APRR5; AltName: Full=Pseudo-response regulator 5
Q8L500.2_APRR9	Q8L500.2 RecName: Full=Two-component response regulator-like APRR9; AltName: Full=Pseudo-response regulator 9
Q689G6.1_OsPRR95	Q689G6.1 RecName: Full=Two-component response regulator-like PRR95; AltName: Full=Pseudo-response regulator 95; Short=OsPRR95
Q9LKL2.1_APRR1	Q9LKL2.1 RecName: Full=Two-component response regulator-like APRR1; AltName: Full=ABI3-interacting protein 1; AltName: Full=Pseudo-response regulator 1; AltName: Full=Timing of CAB expression 1
Q689G9.2_OsPRR1	Q689G9.2 RecName: Full=Two-component response regulator-like PRR1; AltName: Full=Pseudo-response regulator 1; Short=OsPRR1
Q9ZWJ9.1_ARR2	Q9ZWJ9.1 RecName: Full=Two-component response regulator ARR2; AltName: Full=Receiver-like protein 5
Q940D0.2_ARR1	Q940D0.2 RecName: Full=Two-component response regulator ARR1
O49397.1_ARR10	O49397.1 RecName: Full=Two-component response regulator ARR10; AltName: Full=Receiver-like protein 4
P62598.2_ARR12	P62598.2 RecName: Full=Two-component response regulator ARR12
Q8H7S7.1_OsRRB1	Q8H7S7.1 RecName: Full=Two-component response regulator ORR21; AltName: Full=OsRRB1
A2XE31.1_ORR21	A2XE31.1 RecName: Full=Two-component response regulator ORR21
Q5SML5.1_OsRRB4	Q5SML5.1 RecName: Full=Two-component response regulator ORR22; AltName: Full=OsRRB4
B8B3I4.1_ORR22	B8B3I4.1 RecName: Full=Two-component response regulator ORR22
Q5N6V8.2_OsRRB6	Q5N6V8.2 RecName: Full=Two-component response regulator ORR26; AltName: Full=OsRRB6
Q9FXD6.1_ARR11	Q9FXD6.1 RecName: Full=Two-component response regulator ARR11; AltName: Full=Receiver-like protein 3
A2X1N2.1_ORR24	A2X1N2.1 RecName: Full=Two-component response regulator ORR24
Q6H805.1_OsRRB2	Q6H805.1 RecName: Full=Two-component response regulator ORR24; AltName: Full=OsRRB2
B8AEH1.1_ORR23	B8AEH1.1 RecName: Full=Two-component response regulator ORR23
Q6K8X6.1_OsRRB5	Q6K8X6.1 RecName: Full=Two-component response regulator ORR23; AltName: Full=OsRRB5
Q8L9Y3.2_ARR14	Q8L9Y3.2 RecName: Full=Two-component response regulator ARR14
Q7Y0W3.1_EHD1	Q7Y0W3.1 RecName: Full=Two-component response regulator EHD1; AltName: Full=Protein EARLY HEADING DATE 1
Q7Y0W5.1_ORR30	Q7Y0W5.1 RecName: Full=Two-component response regulator ORR30; AltName: Full=Protein EARLY HEADING DATE 1; AltName: Full=Two-component response regulator EHD1
Q6K9T0.1_OsRRA7	Q6K9T0.1 RecName: Full=Two-component response regulator ORR3; AltName: Full=OsRR3; AltName: Full=OsRRA7
Q6H468.1_OsRRA8	Q6H468.1 RecName: Full=Two-component response regulator ORR11; AltName: Full=OsRR11; AltName: Full=OsRRA8
Q0PVB3.1_OsRRA5	Q0PVB3.1 RecName: Full=Two-component response regulator ORR7; AltName: Full=OsRR7; AltName: Full=OsRRA5
O82798.1_ARR4	O82798.1 RecName: Full=Two-component response regulator ARR4; AltName: Full=Response regulator 1
Q67W50.1_OsRRB3	Q67W50.1 RecName: Full=Two-component response regulator ORR25; AltName: Full=OsRRB3
Q9ZWS9.1_ARR3	Q9ZWS9.1 RecName: Full=Two-component response regulator ARR3
Q2HWH1.1_OsRRA4	Q2HWH1.1 RecName: Full=Two-component response regulator ORR5; AltName: Full=OsRR5; AltName: Full=OsRRA4
Q23917.1_dPDE2	Q23917.1 RecName: Full=3',5'-cyclic-nucleotide phosphodiesterase regA; Short=PDEase regA; AltName: Full=Phosphodiesterase 2; Short=DdPDE2; AltName: Full=Response regulator protein A; AltName: Full=cAMP-specific 3',5'-cAMP phosphodiesterase 2
Q942A1.1_OsRR4	Q942A1.1 RecName: Full=Two-component response regulator ORR4; AltName: Full=OsRR4
Q2QXY3.2_OsRRA2	Q2QXY3.2 RecName: Full=Two-component response regulator ORR10; AltName: Full=OsRR10; AltName: Full=OsRRA2
Q8GVV6.1_OsRRA13	Q8GVV6.1 RecName: Full=Two-component response regulator ORR8; AltName: Full=OsRR8; AltName: Full=OsRRA13
Q9ZWS7.1_ARR7	Q9ZWS7.1 RecName: Full=Two-component response regulator ARR7
Q7G8V2.1_ARR15	Q7G8V2.1 RecName: Full=Two-component response regulator ARR15
Q9FGT7.2_ARR18	Q9FGT7.2 RecName: Full=Two-component response regulator ARR18
Q4GZK2.1_OsRR9	Q4GZK2.1 RecName: Full=Two-component response regulator ORR9; AltName: Full=Type A response regulator 9; Short=OsRR9
Q4GZL0.1_OsRR1	Q4GZL0.1 RecName: Full=Two-component response regulator ORR1; AltName: Full=Type A response regulator 1; Short=OsRR1
Q2HWG4.1_OsRRA9	Q2HWG4.1 RecName: Full=Two-component response regulator ORR1; AltName: Full=OsRR1; AltName: Full=OsRRA9
Q2HWG1.1_OsRRA11	Q2HWG1.1 RecName: Full=Two-component response regulator ORR12; AltName: Full=OsRR12; AltName: Full=OsRRA11
Q9LZJ8.1_ARR20	Q9LZJ8.1 RecName: Full=Putative two-component response regulator ARR20
Q9SB04.2_ARR5	Q9SB04.2 RecName: Full=Two-component response regulator ARR5; AltName: Full=Response reactor 2
Q7XQA6.1_OsRR6	Q7XQA6.1 RecName: Full=Two-component response regulator ORR6; AltName: Full=OsRR6; AltName: Full=OsRRA6
A2XYV5.1_OsRR6	A2XYV5.1 RecName: Full=Two-component response regulator ORR6; AltName: Full=Type A response regulator 6; Short=OsRR6
Q9ZWS6.2_ARR6	Q9ZWS6.2 RecName: Full=Two-component response regulator ARR6
O80366.1_ARR9	O80366.1 RecName: Full=Two-component response regulator ARR9; AltName: Full=Response reactor 4
O80365.1_ARR8	O80365.1 RecName: Full=Two-component response regulator ARR8; AltName: Full=Response reactor 3
Q4GZK4.1_OsRR7	Q4GZK4.1 RecName: Full=Two-component response regulator ORR7; AltName: Full=Type A response regulator 7; Short=OsRR7
Q9FPR6.1_ARR17	Q9FPR6.1 RecName: Full=Two-component response regulator ARR17
Q75HW2.1_OsRRA16	Q75HW2.1 RecName: Full=Two-component response regulator ORR27; AltName: Full=OsRRA16
Q7XS69.3_OsRRB7	Q7XS69.3 RecName: Full=Two-component response regulator ORR29; AltName: Full=OsRRB7
B8ASH8.1_ORR29	B8ASH8.1 RecName: Full=Two-component response regulator ORR29
Q9APD9.1_ZraR	Q9APD9.1 RecName: Full=Transcriptional regulatory protein ZraR
Q9LYP5.3_ARR21	Q9LYP5.3 RecName: Full=Putative two-component response regulator ARR21
Q82EB1.1_CseB	Q82EB1.1 RecName: Full=Transcriptional regulatory protein CseB
Q6YVX7.1_OsRR2	Q6YVX7.1 RecName: Full=Two-component response regulator ORR2; AltName: Full=OsRR2
Q9SHC2.1_ARR16	Q9SHC2.1 RecName: Full=Two-component response regulator ARR16
P71403.2_CpCh	P71403.2 RecName: Full=Chemotaxis protein CheY homolog
Q9ZM64.1_CheYh	Q9ZM64.1 RecName: Full=Chemotaxis protein CheY homolog
Q9TLQ4.1_OmpR_L	Q9TLQ4.1 RecName: Full=Probable transcriptional regulator ycf27; AltName: Full=OmpR-like protein
P14375.2_ZraR	P14375.2 RecName: Full=Transcriptional regulatory protein ZraR
O23100.2_APRR8	O23100.2 RecName: Full=Putative two-component response regulator-like APRR8; AltName: Full=Pseudo-response regulator 8
Q9M9B9.2_ARR19	Q9M9B9.2 RecName: Full=Putative two-component response regulator ARR19
Q9ZEP4.1_Trp CseB	Q9ZEP4.1 RecName: Full=Transcriptional regulatory protein CseB
A1W0A5.1_CheYh	A1W0A5.1 RecName: Full=Chemotaxis protein CheY homolog
Q5HFT0.1_SrrA	Q5HFT0.1 RecName: Full=Transcriptional regulatory protein SrrA; AltName: Full=Staphylococcal respiratory response protein A
Q6LA43.2_TOC2	Q6LA43.2 RecName: Full=Two-component response regulator-like APRR2; AltName: Full=Pseudo-response regulator 2; AltName: Full=TOC2 protein
Q1XDE4.1_ycf29	Q1XDE4.1 RecName: Full=Probable transcriptional regulator ycf29
Q8X613.1_ZraR	Q8X613.1 RecName: Full=Transcriptional regulatory protein ZraR
A5W4E3.1_TodS	A5W4E3.1 RecName: Full=Sensor histidine kinase TodS
E0X9C7.1_TodS	E0X9C7.1 RecName: Full=Sensor histidine kinase TodS
P48259.1_ycf27	P48259.1 RecName: Full=Probable transcriptional regulator ycf27; AltName: Full=OmpR-like protein
P45189.1_PhoB	P45189.1 RecName: Full=Phosphate regulon transcriptional regulatory protein PhoB
Q9FJ16.1_APRR4	Q9FJ16.1 RecName: Full=Putative two-component response regulator-like APRR4; AltName: Full=Pseudo-response regulator 4
P28835.1_ycf27	P28835.1 RecName: Full=Probable transcriptional regulator ycf27; AltName: Full=OmpR-like protein
Q9C9F6.2_APRR6	Q9C9F6.2 RecName: Full=Putative two-component response regulator-like APRR6; AltName: Full=Pseudo-response regulator 6
Q7XKS9.1ORR28	Q7XKS9.1 RecName: Full=Two-component response regulator ORR28; AltName: Full=OsRRA22
Q8KIY1.1_TmoS	Q8KIY1.1 RecName: Full=Sensor histidine kinase TmoS
A2XS50.1_ORR28	A2XS50.1 RecName: Full=Two-component response regulator ORR28
O78428.1_ycf27	O78428.1 RecName: Full=Probable transcriptional regulator ycf27; AltName: Full=OmpR-like protein
O34951.1_BceR	O34951.1 RecName: Full=Sensory transduction protein BceR
Q9K621.1_BceR	Q9K621.1 RecName: Full=Sensory transduction protein BceR
A7N6S2.1_CqsS	A7N6S2.1 RecName: Full=CAI-1 autoinducer sensor kinase/phosphatase CqsS; AltName: Full=Cholerae quorum-sensing sensor
Q06065.2_AtoC	Q06065.2 RecName: Full=Regulatory protein AtoC; AltName: Full=Acetoacetate metabolism regulatory protein; AltName: Full=DNA-binding transcriptional regulator AtoC; AltName: Full=Ornithine decarboxylase antizyme
O34903.1_YkoG	O34903.1 RecName: Full=Uncharacterized transcriptional regulatory protein YkoG
Q8Z333.1_ZraR	Q8Z333.1 RecName: Full=Transcriptional regulatory protein ZraR
P25852.2_ZraR	P25852.2 RecName: Full=Transcriptional regulatory protein ZraR
Q5A599.3_NIK1	Q5A599.3 RecName: Full=Histidine protein kinase NIK1
Q54YZ9.2_Hsthk_J	Q54YZ9.2 RecName: Full=Hybrid signal transduction histidine kinase J
P0AFB9.1_NRI	P0AFB9.1 RecName: Full=DNA-binding transcriptional regulator NtrC; AltName: Full=Nitrogen regulation protein NR(I); AltName: Full=Nitrogen regulator I; Short=NRI
Q01473.2_RcaC	Q01473.2 RecName: Full=Protein RcaC
Q5V0B3.1_Pgm	Q5V0B3.1 RecName: Full=Protein-glutamate methylesterase/protein-glutamine glutaminase
Q54SK5.1_HsthkM	Q54SK5.1 RecName: Full=Hybrid signal transduction histidine kinase M
Q44929.1_GtcR	Q44929.1 RecName: Full=Response regulator GtcR

## Sheet: Sheet2
Supplementary Table S2 Sequences retrieved from NCBI and Phytozome
Acession number and short name	Annotation
A2YQ93.2_OsPRR37	A2YQ93.2 RecName: Full=Two-component response regulator-like PRR37; AltName: Full=Pseudo-response regulator 37; Short=OsPRR37
Q0D3B6.1_OsPRR37	Q0D3B6.1 RecName: Full=Two-component response regulator-like PRR37; AltName: Full=Protein DAYS TO HEADING 7; AltName: Full=Protein HEADING DATE 2; AltName: Full=Pseudo-response regulator 37; Short=OsPRR37
A2XFB7.2_OsPRR73	A2XFB7.2 RecName: Full=Two-component response regulator-like PRR73; AltName: Full=Pseudo-response regulator 73; Short=OsPRR73
Q10N34.1_OsPRR73	Q10N34.1 RecName: Full=Two-component response regulator-like PRR73; AltName: Full=Pseudo-response regulator 73; Short=OsPRR73
Q93WK5.1_APRR7	Q93WK5.1 RecName: Full=Two-component response regulator-like APRR7; AltName: Full=Pseudo-response regulator 7
Q9LVG4.1_APRR3	Q9LVG4.1 RecName: Full=Two-component response regulator-like APRR3; AltName: Full=Pseudo-response regulator 3
Q6LA42.2_APRR5	Q6LA42.2 RecName: Full=Two-component response regulator-like APRR5; AltName: Full=Pseudo-response regulator 5
Q8L500.2_APRR9	Q8L500.2 RecName: Full=Two-component response regulator-like APRR9; AltName: Full=Pseudo-response regulator 9
Q689G6.1_OsPRR95	Q689G6.1 RecName: Full=Two-component response regulator-like PRR95; AltName: Full=Pseudo-response regulator 95; Short=OsPRR95
Q9LKL2.1_APRR1	Q9LKL2.1 RecName: Full=Two-component response regulator-like APRR1; AltName: Full=ABI3-interacting protein 1; AltName: Full=Pseudo-response regulator 1; AltName: Full=Timing of CAB expression 1
Q689G9.2_OsPRR1	Q689G9.2 RecName: Full=Two-component response regulator-like PRR1; AltName: Full=Pseudo-response regulator 1; Short=OsPRR1
Q9ZWJ9.1_ARR2	Q9ZWJ9.1 RecName: Full=Two-component response regulator ARR2; AltName: Full=Receiver-like protein 5
Q940D0.2_ARR1	Q940D0.2 RecName: Full=Two-component response regulator ARR1
O49397.1_ARR10	O49397.1 RecName: Full=Two-component response regulator ARR10; AltName: Full=Receiver-like protein 4
P62598.2_ARR12	P62598.2 RecName: Full=Two-component response regulator ARR12
Q9FXD6.1_ARR11	Q9FXD6.1 RecName: Full=Two-component response regulator ARR11; AltName: Full=Receiver-like protein 3
Q8L9Y3.2_ARR14	Q8L9Y3.2 RecName: Full=Two-component response regulator ARR14
O82798.1_ARR4	O82798.1 RecName: Full=Two-component response regulator ARR4; AltName: Full=Response regulator 1
Q9ZWS9.1_ARR3	Q9ZWS9.1 RecName: Full=Two-component response regulator ARR3
Q942A1.1_OsRR4	Q942A1.1 RecName: Full=Two-component response regulator ORR4; AltName: Full=OsRR4
Q9ZWS7.1_ARR7	Q9ZWS7.1 RecName: Full=Two-component response regulator ARR7
Q7G8V2.1_ARR15	Q7G8V2.1 RecName: Full=Two-component response regulator ARR15
Q9FGT7.2_ARR18	Q9FGT7.2 RecName: Full=Two-component response regulator ARR18
Q4GZK2.1_OsRR9	Q4GZK2.1 RecName: Full=Two-component response regulator ORR9; AltName: Full=Type A response regulator 9; Short=OsRR9
Q4GZL0.1_OsRR1	Q4GZL0.1 RecName: Full=Two-component response regulator ORR1; AltName: Full=Type A response regulator 1; Short=OsRR1
Q9LZJ8.1_ARR20	Q9LZJ8.1 RecName: Full=Putative two-component response regulator ARR20
Q9SB04.2_ARR5	Q9SB04.2 RecName: Full=Two-component response regulator ARR5; AltName: Full=Response reactor 2
Q7XQA6.1_OsRR6	Q7XQA6.1 RecName: Full=Two-component response regulator ORR6; AltName: Full=OsRR6; AltName: Full=OsRRA6
Q9ZWS6.2_ARR6	Q9ZWS6.2 RecName: Full=Two-component response regulator ARR6
O80366.1_ARR9	O80366.1 RecName: Full=Two-component response regulator ARR9; AltName: Full=Response reactor 4
O80365.1_ARR8	O80365.1 RecName: Full=Two-component response regulator ARR8; AltName: Full=Response reactor 3
Q4GZK4.1_OsRR7	Q4GZK4.1 RecName: Full=Two-component response regulator ORR7; AltName: Full=Type A response regulator 7; Short=OsRR7
Q9FPR6.1_ARR17	Q9FPR6.1 RecName: Full=Two-component response regulator ARR17
Q75HW2.1_OsRRA16	Q75HW2.1 RecName: Full=Two-component response regulator ORR27; AltName: Full=OsRRA16
Q9LYP5.3_ARR21	Q9LYP5.3 RecName: Full=Putative two-component response regulator ARR21
Q6YVX7.1_OsRR2	Q6YVX7.1 RecName: Full=Two-component response regulator ORR2; AltName: Full=OsRR2
Q9SHC2.1_ARR16	Q9SHC2.1 RecName: Full=Two-component response regulator ARR16
O23100.2_APRR8	O23100.2 RecName: Full=Putative two-component response regulator-like APRR8; AltName: Full=Pseudo-response regulator 8
Q9M9B9.2_ARR19	Q9M9B9.2 RecName: Full=Putative two-component response regulator ARR19
Q6LA43.2_TOC2	Q6LA43.2 RecName: Full=Two-component response regulator-like APRR2; AltName: Full=Pseudo-response regulator 2; AltName: Full=TOC2 protein
Q9FJ16.1_APRR4	Q9FJ16.1 RecName: Full=Putative two-component response regulator-like APRR4; AltName: Full=Pseudo-response regulator 4
Q9C9F6.2_APRR6	Q9C9F6.2 RecName: Full=Putative two-component response regulator-like APRR6; AltName: Full=Pseudo-response regulator 6
Glyma.12G073900.1
Glyma.U034500.3
Glyma.10G048100.1
Glyma.13G135900.3
