# Supplementary material for: Positional Cloning of the Flowering Time QTL qFT12-1 Reveals the Link Between the Clock Related PRR Homolog With Photoperiodic Response in Soybeans
Source: Front Plant Sci. 2019 Oct 15;10:1303. doi: 10.3389/fpls.2019.01303 (PMC6803524; doi:10.3389/fpls.2019.01303)
Supplement: Supplementary file 5 [file Table_3.xlsx]

## Sheet: Sheet1
Supplementary Table S3 General information of soybean accessions
Cultivar	GenoType	Species	Maturity Date
PI 339734	TT	Landrace	-
ZDD00324	TT	Glycine gracilis	-
ZDD14334	TT	Glycine gracilis	-
ZYD4215	TT	Glycine gracilis	-
PI 366121	TT	Glycine soja	IV - MATURITY GROUP IV
PI 483463	TT	Glycine soja	III - MATURITY GROUP III
IT162825	TT	Glycine soja	-
SOYhyuRBXDEAPE	TT	Glycine soja	-
SOYhyuRCHDEAPE	TT	Glycine soja	-
SOYhyuRBWDEBPE	TT	Glycine soja	-
SOYhyuRCLDEAPE	TT	Glycine soja	-
SOYhyuRCFDEBPE	TT	Glycine soja	-
SOYhyuRBZDEBPE	TT	Glycine soja	-
SOYhyuRBYDEBPE	TT	Glycine soja	-
SOYhyuRCGDEBPE	TT	Glycine soja	-
SOYhyuRCEDEAPE	TT	Glycine soja	-
SOYhyuRCKDEAPE	TT	Glycine soja	-
GLYqdjRBUDEAPE	TT	Glycine soja	-
GLYqdjRAODEAPE	TT	Glycine soja	-
GLYqdjRAKDEAPE	TT	Glycine soja	-
GLYqdjRARDEAPE	TT	Glycine soja	-
GLYqdjRAMDEAPE	TT	Glycine soja	-
Xia Men Teng Zai Dou	TT	Improved cultivar	-
PI 603756	TT	Improved cultivar	II - MATURITY GROUP II
Sha Xian Qin Dou	TT	Improved cultivar	-
Bai Mao Dou	TT	Improved cultivar	-
PI 84987	TT	Improved cultivar	III - MATURITY GROUP III
PI 548298	TT	Improved cultivar	III - MATURITY GROUP III
PI 548657	TT	Improved cultivar	VII - MATURITY GROUP VII
Jin Da No.62	TT	Improved cultivar	-
PI 547409	TT	Improved cultivar	IV - MATURITY GROUP IV
PI 553047	TT	Improved cultivar	VII - MATURITY GROUP VII
PI 547562	TT	Improved cultivar	IV - MATURITY GROUP IV
He Dou No.13	TT	Improved cultivar	-
Zhong Huang No.14	TT	Improved cultivar	-
PI 591433	TT	Improved cultivar	0 - MATURITY GROUP 0
Gui Chun No.8	TT	Improved cultivar	-
PI 533655	TT	Improved cultivar	II - MATURITY GROUP II
Dong Nong No.26	TT	Improved cultivar	-
Jin Da No.75	TT	Improved cultivar	-
PI 548638	TT	Improved cultivar	0 - MATURITY GROUP 0
PI 547460	TT	Improved cultivar	IV - MATURITY GROUP IV
Shen Li No.3	TT	Improved cultivar	-
Jin Da No.26	TT	Improved cultivar	-
PI 518750	TT	Improved cultivar	I - MATURITY GROUP I
Chang Nong No.13	TT	Improved cultivar	-
PI 548540	TT	Improved cultivar	II - MATURITY GROUP II
Liao Dou No.17	TT	Improved cultivar	-
PI 540552	TT	Improved cultivar	II - MATURITY GROUP II
PI 547686	TT	Improved cultivar	II - MATURITY GROUP II
PI 548644	TT	Improved cultivar	0 - MATURITY GROUP 0
PI 547488	TT	Improved cultivar	IV - MATURITY GROUP IV
He Feng No.25	TT	Improved cultivar	-
PI 548311	TT	Improved cultivar	0 - MATURITY GROUP 0
PI 518664	TT	Improved cultivar	V - MATURITY GROUP V
Jin Da No.73	TT	Improved cultivar	-
PI 591435	TT	Improved cultivar	I - MATURITY GROUP I
Zhong Huang No.50	TT	Improved cultivar	-
Nan Nong Cai Dou No.1	TT	Improved cultivar	-
PI 548512	TT	Improved cultivar	II - MATURITY GROUP II
PI 547690	TT	Improved cultivar	II - MATURITY GROUP II
PI 548182	TT	Improved cultivar	III - MATURITY GROUP III
PI 515961	TT	Improved cultivar	IV - MATURITY GROUP IV
PI 548190	TT	Improved cultivar	II - MATURITY GROUP II
PI 548643	TT	Improved cultivar	00 - MATURITY GROUP 00
Zhong Huang No.38	TT	Improved cultivar	-
Beijing-IGDB-1	TT	Improved cultivar	-
Zhong Huang No.13	TT	Improved cultivar	-
Chang Nong No.16	TT	Improved cultivar	-
PI 548520	TT	Improved cultivar	II - MATURITY GROUP II
PI 548631	TT	Improved cultivar	-
PI 547779	TT	Improved cultivar	II - MATURITY GROUP II
Hei Nong No.51	TT	Improved cultivar	-
Lu Dou No.11	TT	Improved cultivar	-
Tai Wan No.1	TT	Improved cultivar	-
Ji Yu No.90	TT	Improved cultivar	-
Fen Dou No.65	TT	Improved cultivar	-
PI 548565	TT	Improved cultivar	II - MATURITY GROUP II
Fen Dou No.78	TT	Improved cultivar	-
PI 548603	TT	Improved cultivar	IV - MATURITY GROUP IV
PI 508266	TT	Improved cultivar	VI - MATURITY GROUP VI
Sheng Dou No.9	TT	Improved cultivar	-
Zhong Huang No.40	TT	Improved cultivar	-
PI 547716	TT	Improved cultivar	II - MATURITY GROUP II
PI 546044	TT	Improved cultivar	00 - MATURITY GROUP 00
Zhong Huang No.35	TT	Improved cultivar	-
Harbin 91-6065	TT	Improved cultivar	-
Chang Nong No.15	TT	Improved cultivar	-
PI 518711	TT	Improved cultivar	II - MATURITY GROUP II
Liao Dou No.21	TT	Improved cultivar	-
PI 548573	TT	Improved cultivar	II - MATURITY GROUP II
Fen Dou No.85	TT	Improved cultivar	-
PI 548604	TT	Improved cultivar	IV - MATURITY GROUP IV
Hei He No.1	TT	Improved cultivar	-
PI 533602	TT	Improved cultivar	VI - MATURITY GROUP VI
Xi Zang Da Dou No.20	TT	Improved cultivar	-
Cang Dou-11	TT	Improved cultivar	-
Liao Dou No.11	TT	Improved cultivar	-
PI 536635	TT	Improved cultivar	III - MATURITY GROUP III
Dong Nong No.52	TT	Improved cultivar	-
Fen Dou No.86	TT	Improved cultivar	-
PI 508083	TT	Improved cultivar	0 - MATURITY GROUP 0
PI 591541	TT	Improved cultivar	II - MATURITY GROUP II
Su Nong No.10	TT	Improved cultivar	-
PI 548593	TT	Improved cultivar	00 - MATURITY GROUP 00
Wei No.6823	TT	Improved cultivar	-
Su Nong No.33	TT	Improved cultivar	-
PI 634883	TT	Improved cultivar	-
Fen Dou No.79	TT	Improved cultivar	-
Jin Da No.52	TT	Improved cultivar	-
He Feng No.23	TT	Improved cultivar	-
PI 591511	TT	Improved cultivar	III - MATURITY GROUP III
Fen Dou No.88	TT	Improved cultivar	-
Liao Dou No.3	TT	Improved cultivar	-
FC 33243	TT	Improved cultivar	IV - MATURITY GROUP IV
PI 548985	TT	Improved cultivar	VI - MATURITY GROUP VI
PI 547680	TT	Improved cultivar	II - MATURITY GROUP II
Zhong Huang No.31	TT	Improved cultivar	-
PI 591431	TT	Improved cultivar	0 - MATURITY GROUP 0
Dong Nong No.51	TT	Improved cultivar	-
PI 548524	TT	Improved cultivar	I - MATURITY GROUP I
Fen Dou No.89	TT	Improved cultivar	-
PI 542403	TT	Improved cultivar	0 - MATURITY GROUP 0
Fen Dou No.63	TT	Improved cultivar	-
Tie Feng No.22	TT	Improved cultivar	-
RM30	TT	Improved cultivar	-
PI 547494	TT	Improved cultivar	IV - MATURITY GROUP IV
PI 547559	TT	Improved cultivar	IV - MATURITY GROUP IV
PI 518664	TT	Improved cultivar	V - MATURITY GROUP V
PI 407788A	TT	Improved cultivar	IV - MATURITY GROUP IV
S05-11482	TT	Improved cultivar	-
PI 548667	TT	Improved cultivar	-
S10-11227	TT	Improved cultivar	-
PI 572239	TT	Improved cultivar	V - MATURITY GROUP V
IA3023	TT	Improved cultivar	-
PI 598124	TT	Improved cultivar	III - MATURITY GROUP III
PI 087617	TT	Improved cultivar	III - MATURITY GROUP III
PI 196175	TT	Improved cultivar	V - MATURITY GROUP V
PI 200508	TT	Improved cultivar	I - MATURITY GROUP I
PI 248515	TT	Improved cultivar	IV - MATURITY GROUP IV
PI 398593	TT	Improved cultivar	V - MATURITY GROUP V
PI 398595	TT	Improved cultivar	V - MATURITY GROUP V
PI 398610	TT	Improved cultivar	V - MATURITY GROUP V
PI 398614	TT	Improved cultivar	V - MATURITY GROUP V
PI 407965	TT	Improved cultivar	V - MATURITY GROUP V
PI 408105A	TT	Improved cultivar	IV - MATURITY GROUP IV
PI 416937	TT	Improved cultivar	VI - MATURITY GROUP VI
PI 437169B	TT	Improved cultivar	II - MATURITY GROUP II
PI 437863A	TT	Improved cultivar	II - MATURITY GROUP II
PI 438258	TT	Improved cultivar	II - MATURITY GROUP II
PI 464920B	TT	Improved cultivar	III - MATURITY GROUP III
PI 471938	TT	Improved cultivar	V - MATURITY GROUP V
PI 475783B	TT	Improved cultivar	III - MATURITY GROUP III
PI 518751	TT	Improved cultivar	II - MATURITY GROUP II
PI 542044	TT	Improved cultivar	III - MATURITY GROUP III
PI 547862	TT	Improved cultivar	III - MATURITY GROUP III
PI 548511	TT	Improved cultivar	II - MATURITY GROUP II
PI 548657	TT	Improved cultivar	VII - MATURITY GROUP VII
PI 552538	TT	Improved cultivar	III - MATURITY GROUP III
PI 561271	TT	Improved cultivar	V - MATURITY GROUP V
PI 567519	TT	Improved cultivar	III - MATURITY GROUP III
PI 567611	TT	Improved cultivar	IV - MATURITY GROUP IV
PI 567651	TT	Improved cultivar	IV - MATURITY GROUP IV
PI 567690	TT	Improved cultivar	III - MATURITY GROUP III
PI 567719	TT	Improved cultivar	IV - MATURITY GROUP IV
PI 567731	TT	Improved cultivar	III - MATURITY GROUP III
PI 591539	TT	Improved cultivar	III - MATURITY GROUP III
PI 593258	TT	Improved cultivar	III - MATURITY GROUP III
PI 594012	TT	Improved cultivar	IV - MATURITY GROUP IV
PI 594599	TT	Improved cultivar	IV - MATURITY GROUP IV
PI 597387	TT	Improved cultivar	III - MATURITY GROUP III
PI 603154	TT	Improved cultivar	V - MATURITY GROUP V
PI 603170	TT	Improved cultivar	IV - MATURITY GROUP IV
PI 603175	TT	Improved cultivar	IV - MATURITY GROUP IV
PI 603176A	TT	Improved cultivar	IV - MATURITY GROUP IV
PI 605869A	TT	Improved cultivar	V - MATURITY GROUP V
PI 639740	TT	Improved cultivar	-
PI 647086	TT	Improved cultivar	III - MATURITY GROUP III
PI 658519	TT	Improved cultivar	-
S07-5049	TT	Improved cultivar	-
V71-370	TT	Improved cultivar	-
PI 438471	TT	Improved cultivar	00 - MATURITY GROUP 00
PI 417015	TT	Improved cultivar	III - MATURITY GROUP III
BRS 232	TT	Improved cultivar	-
BR 16	TT	Improved cultivar	-
BRS 360 RR	TT	Improved cultivar	-
BRS/GO 8660	TT	Improved cultivar	-
BRSMT Pintado	TT	Improved cultivar	-
CD 201	TT	Improved cultivar	-
Embrapa 48	TT	Improved cultivar	-
BRS 361	TT	Improved cultivar	-
PI 628856	TT	Improved cultivar	-
NA 5909 RG	TT	Improved cultivar	-
P98Y11	TT	Improved cultivar	-
Vmax RR	TT	Improved cultivar	-
BRS/GO 8360	TT	Improved cultivar	-
PI 628879	TT	Improved cultivar	-
Anta 82	TT	Improved cultivar	-
Zhong Huang No.24	TT	Improved cultivar	-
PI 548533	TT	Improved cultivar	IV - MATURITY GROUP IV
PI 547439	TT	Improved cultivar	IV - MATURITY GROUP IV
CAD_1007	TT	Improved cultivar	-
CAD_1069	TT	Improved cultivar	-
CAD_1099	TT	Improved cultivar	-
CAD_1054	TT	Improved cultivar	-
CAD_1079	TT	Improved cultivar	-
CAD_1056	TT	Improved cultivar	-
CAD_1029	TT	Improved cultivar	-
CAD_1061	TT	Improved cultivar	-
CAD_1067	TT	Improved cultivar	-
CAD_1083	TT	Improved cultivar	-
CAD_1059	TT	Improved cultivar	-
CAD_1066	TT	Improved cultivar	-
CAD_1010	TT	Improved cultivar	-
CAD_1023	TT	Improved cultivar	-
CAD_1084	TT	Improved cultivar	-
CAD_1049	TT	Improved cultivar	-
CAD_1080	TT	Improved cultivar	-
CAD_1044	TT	Improved cultivar	-
CAD_1022	TT	Improved cultivar	-
CAD_1008	TT	Improved cultivar	-
CAD_1020	TT	Improved cultivar	-
CAD_1026	TT	Improved cultivar	-
CAD_1043	TT	Improved cultivar	-
CAD_1035	TT	Improved cultivar	-
CAD_1095	TT	Improved cultivar	-
CAD_1037	TT	Improved cultivar	-
CAD_1021	TT	Improved cultivar	-
CAD_1036	TT	Improved cultivar	-
CAD_1068	TT	Improved cultivar	-
CAD_1098	TT	Improved cultivar	-
CAD_1016	TT	Improved cultivar	-
CAD_1052	TT	Improved cultivar	-
CAD_1065	TT	Improved cultivar	-
CAD_1057	TT	Improved cultivar	-
CAD_1011	TT	Improved cultivar	-
CAD_1062	TT	Improved cultivar	-
CAD_1103	TT	Improved cultivar	-
CAD_1053	TT	Improved cultivar	-
CAD_1048	TT	Improved cultivar	-
CAD_1075	TT	Improved cultivar	-
CAD_1094	TT	Improved cultivar	-
CAD_1025	TT	Improved cultivar	-
CAD_1060	TT	Improved cultivar	-
CAD_1072	TT	Improved cultivar	-
CAD_1028	TT	Improved cultivar	-
CAD_1031	TT	Improved cultivar	-
CAD_1089	TT	Improved cultivar	-
CAD_1003	TT	Improved cultivar	-
CAD_1047	TT	Improved cultivar	-
CAD_1017	TT	Improved cultivar	-
CAD_1019	TT	Improved cultivar	-
CAD_1009	TT	Improved cultivar	-
CAD_1055	TT	Improved cultivar	-
CAD_1050	TT	Improved cultivar	-
CAD_1074	TT	Improved cultivar	-
CAD_1076	TT	Improved cultivar	-
CAD_1070	TT	Improved cultivar	-
CAD_1088	TT	Improved cultivar	-
CAD_1015	TT	Improved cultivar	-
CAD_1033	TT	Improved cultivar	-
CAD_1046	TT	Improved cultivar	-
CAD_1102	TT	Improved cultivar	-
CAD_1082	TT	Improved cultivar	-
CAD_1064	TT	Improved cultivar	-
CAD_1087	TT	Improved cultivar	-
CAD_1071	TT	Improved cultivar	-
CAD_1090	TT	Improved cultivar	-
CAD_1078	TT	Improved cultivar	-
CAD_1073	TT	Improved cultivar	-
CAD_1002	TT	Improved cultivar	-
CAD_1063	TT	Improved cultivar	-
CAD_1058	TT	Improved cultivar	-
CAD_1018	TT	Improved cultivar	-
CAD_1032	TT	Improved cultivar	-
CAD_1041	TT	Improved cultivar	-
CAD_1085	TT	Improved cultivar	-
CAD_1091	TT	Improved cultivar	-
CAD_1005	TT	Improved cultivar	-
CAD_1096	TT	Improved cultivar	-
CAD_1039	TT	Improved cultivar	-
CAD_1081	TT	Improved cultivar	-
CAD_1006	TT	Improved cultivar	-
CAD_1045	TT	Improved cultivar	-
CAD_1013	TT	Improved cultivar	-
CAD_1040	TT	Improved cultivar	-
CAD_1086	TT	Improved cultivar	-
CAD_1097	TT	Improved cultivar	-
CAD_1038	TT	Improved cultivar	-
CAD_1014	TT	Improved cultivar	-
CAD_1100	TT	Improved cultivar	-
CAD_1034	TT	Improved cultivar	-
CAD_1093	TT	Improved cultivar	-
CAD_1012	TT	Improved cultivar	-
CAD_1004	TT	Improved cultivar	-
CAD_1051	TT	Improved cultivar	-
CAD_1001	TT	Improved cultivar	-
CAD_1077	TT	Improved cultivar	-
CAD_1027	TT	Improved cultivar	-
CAD_1042	TT	Improved cultivar	-
Noir1-SGC-01 x 2012CM7F040P06 (derived from 'M92-220')	TT	Improved cultivar	-
Noir1-SGC-01 x 2012CM7F040P06 (derived from 'M92-220')	TT	Improved cultivar	-
Enrei	TT	Improved cultivar	-
Sowon	TT	Improved cultivar	-
Pureun	TT	Improved cultivar	-
Kwangkyo	TT	Improved cultivar	-
Ilpumgeomjeong	TT	Improved cultivar	-
Hwangkeum	TT	Improved cultivar	-
Williams 82K	TT	Improved cultivar	-
SOYhyuRCPDEAPE	TT	Improved cultivar	-
SOYhyuRCWDEBPE	TT	Improved cultivar	-
SOYhyuRCQDEAPE	TT	Improved cultivar	-
SOYhyuRCRDEAPE	TT	Improved cultivar	-
SOYhyuRCNDEAPE	TT	Improved cultivar	-
SOYhyuRCXDEBPE	TT	Improved cultivar	-
SOYhyuRCYDEAPE	TT	Improved cultivar	-
SOYhyuRCVDEAPE	TT	Improved cultivar	-
SOYhyuRCODEAPE	TT	Improved cultivar	-
GLYqdjRAGDEAPE	TT	Improved cultivar	-
GLYqdjRABDEAPE	TT	Improved cultivar	-
GLYqdjRAXDEAPE	TT	Improved cultivar	-
GLYqdjRACDEAPE	TT	Improved cultivar	-
GLYqdjRAWDEAPE	TT	Improved cultivar	-
GLYqdjRBEDEBPE	TT	Improved cultivar	-
GLYqdjRBPDEAPE	TT	Improved cultivar	-
GLYqdjRBQDEAPE	TT	Improved cultivar	-
GLYqdjRAYDEAPE	TT	Improved cultivar	-
GLYqdjRAVDEAPE	TT	Improved cultivar	-
GLYqdjRASDEAPE	TT	Improved cultivar	-
GLYqdjRAPDEAPE	TT	Improved cultivar	-
GLYqdjRAEDEAPE	TT	Improved cultivar	-
GLYqdjRBXDEAPE	TT	Improved cultivar	-
GLYqdjRAFDEAPE	TT	Improved cultivar	-
M92-220	TT	Improved cultivar	-
Noir1	TT	Improved cultivar	-
Bert MN-01 Plant 1	TT	Improved cultivar	-
Bert MN-01 Plant 2	TT	Improved cultivar	-
WPT 389-2-2	TT	Improved cultivar	-
Williams_SGC01_NEB	TT	Improved cultivar	-
Williams 82	TT	Improved cultivar	-
PI 594615	TT	Landrace	IV - MATURITY GROUP IV
Yu Shi Dou	TT	Landrace	-
PI 196166	TT	Landrace	V - MATURITY GROUP V
PI 467343	TT	Landrace	I - MATURITY GROUP I
PI 567525	TT	Landrace	II - MATURITY GROUP II
Long quan Da Dou	TT	Landrace	-
PI 603384	TT	Landrace	III - MATURITY GROUP III
Qing Dou	TT	Landrace	-
Nan Guan Xiao PI Qing	TT	Landrace	-
PI 416971	TT	Landrace	IV - MATURITY GROUP IV
PI 594777	TT	Landrace	IV - MATURITY GROUP IV
PI 548342	TT	Landrace	IV - MATURITY GROUP IV
PI 548485	TT	Landrace	VII - MATURITY GROUP VII
PI Xian Da Zi Huo Cao	TT	Landrace	-
PI 507355	TT	Landrace	I - MATURITY GROUP I
PI 587552	TT	Landrace	VII - MATURITY GROUP VII
Yu Jiang Wu Yue Niu Mao Huang	TT	Landrace	-
PI 603336	TT	Landrace	II - MATURITY GROUP II
PI 437321	TT	Landrace	III - MATURITY GROUP III
PI 603596	TT	Landrace	III - MATURITY GROUP III
Tian E Dan	TT	Landrace	-
PI 602991	TT	Landrace	IV - MATURITY GROUP IV
PI 407801	TT	Landrace	VI - MATURITY GROUP VI
PI Xian Nian Zhuang Liu Yue Xian	TT	Landrace	-
Yi Zheng Da Li Huang Dou	TT	Landrace	-
PI 398296	TT	Landrace	II - MATURITY GROUP II
Da Qing Ren	TT	Landrace	-
Hu Pi Dou	TT	Landrace	-
Xiang Dou No.4	TT	Landrace	-
PI 603675	TT	Landrace	III - MATURITY GROUP III
Da Tun Xiao Hei Dou	TT	Landrace	-
PI 548417	TT	Landrace	I - MATURITY GROUP I
PI 80837	TT	Landrace	IV - MATURITY GROUP IV
PI 594788	TT	Landrace	-
PI 594301	TT	Landrace	I - MATURITY GROUP I
Tai Xin Niu Mao Huang Yi	TT	Landrace	-
PI 80822	TT	Landrace	III - MATURITY GROUP III
PI 548391	TT	Landrace	II - MATURITY GROUP II
PI 548379	TT	Landrace	0 - MATURITY GROUP 0
PI 153262	TT	Landrace	0 - MATURITY GROUP 0
PI 603318	TT	Landrace	I - MATURITY GROUP I
PI 437653	TT	Landrace	II - MATURITY GROUP II
Tong an Zi Hong Dou	TT	Landrace	-
PI 88479	TT	Landrace	II - MATURITY GROUP II
PI 567189A	TT	Landrace	IV - MATURITY GROUP IV
PI 548406	TT	Landrace	II - MATURITY GROUP II
PI 84631	TT	Landrace	III - MATURITY GROUP III
Xiao Bai Qi	TT	Landrace	-
PI 548382	TT	Landrace	00 - MATURITY GROUP 00
PI 416890	TT	Landrace	0 - MATURITY GROUP 0
PI 587752	TT	Landrace	V - MATURITY GROUP V
PI 424391	TT	Landrace	VI - MATURITY GROUP VI
Pei Xian Xiao You Dou	TT	Landrace	-
PI 603357	TT	Landrace	I - MATURITY GROUP I
Hong Hu Liu Yue Bao	TT	Landrace	-
PI 157421	TT	Landrace	III - MATURITY GROUP III
Ji Shan De Da Li Hei Dou	TT	Landrace	-
PI 567364	TT	Landrace	III - MATURITY GROUP III
PI 548488	TT	Landrace	V - MATURITY GROUP V
Guang Rao Da Qing Dou	TT	Landrace	-
PI 423954	TT	Landrace	0 - MATURITY GROUP 0
PI 587848	TT	Landrace	V - MATURITY GROUP V
Ni Dou	TT	Landrace	-
PI 399043	TT	Landrace	III - MATURITY GROUP III
Ni Ding Hua Mei Dou	TT	Landrace	-
PI 84987A	TT	Landrace	III - MATURITY GROUP III
PI 567395	TT	Landrace	IV - MATURITY GROUP IV
PI 317334A	TT	Landrace	I - MATURITY GROUP I
Xiao Huang Dou	TT	Landrace	-
PI 603424A	TT	Landrace	0 - MATURITY GROUP 0
PI 588053A	TT	Landrace	V - MATURITY GROUP V
PI 594629	TT	Landrace	VI - MATURITY GROUP VI
Bin Hai Da huang Ke Zi Jia	TT	Landrace	-
PI 83945-3	TT	Landrace	I - MATURITY GROUP I
Jin Huang No.35	TT	Landrace	-
PI 567258	TT	Landrace	II - MATURITY GROUP II
PI 404182	TT	Landrace	III - MATURITY GROUP III
Nian Shi Huang Dou	TT	Landrace	-
PI 567503	TT	Landrace	IV - MATURITY GROUP IV
PI 317336	TT	Landrace	0 - MATURITY GROUP 0
PI 594579	TT	Landrace	V - MATURITY GROUP V
PI 253658B	TT	Landrace	I - MATURITY GROUP I
PI 603516	TT	Landrace	VI - MATURITY GROUP VI
PI 567071A	TT	Landrace	-
Dai Mi Dou	TT	Landrace	-
PI 567293	TT	Landrace	II - MATURITY GROUP II
PI 407849	TT	Landrace	III - MATURITY GROUP III
PI 548348	TT	Landrace	III - MATURITY GROUP III
PI 407716	TT	Landrace	I - MATURITY GROUP I
Cu Dou	TT	Landrace	-
PI 417398	TT	Landrace	III - MATURITY GROUP III
Hei He Xiao Huang Dou	TT	Landrace	-
PI 243541	TT	Landrace	IV - MATURITY GROUP IV
Hei Wa Shi Dou	TT	Landrace	-
PI 548362	TT	Landrace	III - MATURITY GROUP III
Jin Da No.70	TT	Landrace	-
PI 591432	TT	Landrace	0 - MATURITY GROUP 0
PI 591495	TT	Landrace	IV - MATURITY GROUP IV
Jiu Nong No.30	TT	Landrace	-
Liao Dou No.15	TT	Landrace	-
PI 548634	TT	Landrace	III - MATURITY GROUP III
PI 547459	TT	Landrace	IV - MATURITY GROUP IV
Su Nong No.25	TT	Landrace	-
PI 495017C	TT	Landrace	IV - MATURITY GROUP IV
PI 468915	TT	Landrace	II - MATURITY GROUP II
PI 507354	TT	Landrace	-
PI 209332	TT	Landrace	IV - MATURITY GROUP IV
PI 424608A	TT	Landrace	IV - MATURITY GROUP IV
PI 548316	TT	Landrace	III - MATURITY GROUP III
PI 612611	TT	Landrace	III - MATURITY GROUP III
PI 086006	TT	Landrace	III - MATURITY GROUP III
PI 087631-1	TT	Landrace	III - MATURITY GROUP III
PI 424078	TT	Landrace	-
PI 458515	TT	Landrace	IV - MATURITY GROUP IV
PI 467312	TT	Landrace	II - MATURITY GROUP II
PI 548317	TT	Landrace	III - MATURITY GROUP III
PI 567354	TT	Landrace	IV - MATURITY GROUP IV
PI 567357	TT	Landrace	III - MATURITY GROUP III
PI 567383	TT	Landrace	V - MATURITY GROUP V
Seoritae	TT	Landrace	-
Haman	TT	Landrace	-
Geomjeongol	TT	Landrace	-
SOYhyuRCUDEBPE	TT	Landrace	-
SOYhyuRDADEAPE	TT	Landrace	-
SOYhyuRCZDEAPE	TT	Landrace	-
SOYhyuRCSDEAPE	TT	Mutant cultivar	-
FN0173217.03.09.01.M5	TT	Mutant cultivar	-
FN0172932.09.08.01.M5	TT	Mutant cultivar	-
FN0175143.05.06.01.M5	TT	Mutant cultivar	-
FN0171501.01.02.M4	TT	Mutant cultivar	-
FN0131633.06.01.M4	TT	Mutant cultivar	-
FN0112228.06.02.01.M5	TT	Mutant cultivar	-
FN0112885.02.06.03.M5	TT	Mutant cultivar	-
FN0163764.04.01.M4	TT	Mutant cultivar	-
FN0164160.03.02.01.01.M6	TT	Mutant cultivar	-
FN0175501.x2.02.01.M5	TT	Mutant cultivar	-
FN0164472.x3.06.01.M5	TT	Mutant cultivar	-
FN0190069.01.01.M4	TT	Mutant cultivar	-
FN0170712.06.41.01.M5	TT	Mutant cultivar	-
FN0170228.07.35.01.M5	TT	Mutant cultivar	-
ZDD00326	CC	Glycine gracilis	-
ZDD02222	CC	Glycine gracilis	-
ZYD3582	CC	Glycine gracilis	-
ZDD14054	CC	Glycine gracilis	-
ZYD1345	CC	Glycine gracilis	-
ZYD5087	CC	Glycine gracilis	-
PI 562565	CC	Glycine soja	-
PI 339871A	CC	Glycine soja	V - MATURITY GROUP V
PI 393551	CC	Glycine soja	X - MATURITY GROUP X
ZJ-Y108	CC	Glycine soja	-
ZJ-Y2300-1	CC	Glycine soja	-
PI 593983	CC	Glycine soja	-
PI 407027	CC	Glycine soja	V - MATURITY GROUP V
PI 597459C	CC	Glycine soja	-
PI 447004	CC	Glycine soja	III - MATURITY GROUP III
PI 423991	CC	Glycine soja	-
PI 407170	CC	Glycine soja	V - MATURITY GROUP V
PI 407131	CC	Glycine soja	VI - MATURITY GROUP VI
PI 597461C	CC	Glycine soja	-
ZJ-Y188	CC	Glycine soja	-
PI 479752	CC	Glycine soja	I - MATURITY GROUP I
PI 468916	CC	Glycine soja	III - MATURITY GROUP III
PI 366123	CC	Glycine soja	IV - MATURITY GROUP IV
PI 407197	CC	Glycine soja	V - MATURITY GROUP V
ZJ-Y191	CC	Glycine soja	-
PI 522182B	CC	Glycine soja	I - MATURITY GROUP I
PI 483460B	CC	Glycine soja	III - MATURITY GROUP III
PI 378692	CC	Glycine soja	IV - MATURITY GROUP IV
PI 464929A	CC	Glycine soja	0 - MATURITY GROUP 0
PI 464935	CC	Glycine soja	VI - MATURITY GROUP VI
ZJ-Y200	CC	Glycine soja	-
PI 522228	CC	Glycine soja	I - MATURITY GROUP I
PI 483464A	CC	Glycine soja	III - MATURITY GROUP III
PI 407275	CC	Glycine soja	IV - MATURITY GROUP IV
PI 407301	CC	Glycine soja	V - MATURITY GROUP V
PI 326582A	CC	Glycine soja	II - MATURITY GROUP II
PI 522216	CC	Glycine soja	III - MATURITY GROUP III
PI 468400A	CC	Glycine soja	IV - MATURITY GROUP IV
PI 479769	CC	Glycine soja	0 - MATURITY GROUP 0
PI 424096	CC	Glycine soja	V - MATURITY GROUP V
ZJ-Y217	CC	Glycine soja	-
PI 504286	CC	Glycine soja	-
PI 458538	CC	Glycine soja	000 - MATURITY GROUP 000
PI 458535	CC	Glycine soja	0 - MATURITY GROUP 0
PI 407285	CC	Glycine soja	VII - MATURITY GROUP VII
ZJ-ZY020	CC	Glycine soja	-
ZJ-Y282	CC	Glycine soja	-
PI 407288	CC	Glycine soja	II - MATURITY GROUP II
PI 578341	CC	Glycine soja	-
PI 549046	CC	Glycine soja	IV - MATURITY GROUP IV
PI 464927A	CC	Glycine soja	000 - MATURITY GROUP 000
PI 483465	CC	Glycine soja	V - MATURITY GROUP V
PI 507662	CC	Glycine soja	VIII - MATURITY GROUP VIII
ZJ-YJ038	CC	Glycine soja	-
PI 547831	CC	Glycine soja	II - MATURITY GROUP II
ZJ-YJ086	CC	Glycine soja	-
PI 378702	CC	Glycine soja	IV - MATURITY GROUP IV
PI 407162	CC	Glycine soja	IV - MATURITY GROUP IV
PI 407184	CC	Glycine soja	IV - MATURITY GROUP IV
PI 424079	CC	Glycine soja	IV - MATURITY GROUP IV
PI 424088	CC	Glycine soja	IV - MATURITY GROUP IV
IT178480	CC	Glycine soja	-
IT182869	CC	Glycine soja	-
IT182840	CC	Glycine soja	-
IT182848	CC	Glycine soja	-
IT182932	CC	Glycine soja	-
SOYhyuRCCDEAPE	CC	Glycine soja	-
SOYhyuRCIDEAPE	CC	Glycine soja	-
SOYhyuRCBDEAPE	CC	Glycine soja	-
SOYhyuRCDDEBPE	CC	Glycine soja	-
SOYhyuRCJDEAPE	CC	Glycine soja	-
SOYhyuRCMDEAPE	CC	Glycine soja	-
SOYlovDBJDIAAPE	CC	Glycine soja	-
GLYqdjRBSDEAPE	CC	Glycine soja	-
GLYqdjRBWDEAPE	CC	Glycine soja	-
GLYqdjRBRDEAPE	CC	Glycine soja	-
PI 548402	CC	Improved cultivar	IV - MATURITY GROUP IV
PI 323576	CC	Improved cultivar	IX - MATURITY GROUP IX
PI 423967	CC	Improved cultivar	-
PI 594512A	CC	Improved cultivar	VII - MATURITY GROUP VII
BRS 284	CC	Improved cultivar	-
BRS Sambaiba	CC	Improved cultivar	-
BRS Valiosa RR	CC	Improved cultivar	-
BRSMG 850G RR	CC	Improved cultivar	-
FT Abyara	CC	Improved cultivar	-
FT Cristalina	CC	Improved cultivar	-
PI 628946	CC	Improved cultivar	-
BR/MG 46 (Conquista)	CC	Improved cultivar	-
PI 628889	CC	Improved cultivar	-
BRSMT Uirapuru	CC	Improved cultivar	-
PI 483252	CC	Improved cultivar	IX - MATURITY GROUP IX
Emgopa 301	CC	Improved cultivar	-
Hua Xia No.3	CC	Improved cultivar	-
CAD_1101	CC	Improved cultivar	-
GLYqdjRAUDEAPE	CC	Improved cultivar	-
GLYqdjRAQDEAPE	CC	Improved cultivar	-
Xiao Bai Dou	CC	Landrace	-
PI 548445	CC	Landrace	VII - MATURITY GROUP VII
You Pi Zhi Hei Dou	CC	Landrace	-
Dong Shan Bai Ma Dou	CC	Landrace	-
Sha Xin Dou	CC	Landrace	-
Xia Hei Dou	CC	Landrace	-
Da Li Huang	CC	Landrace	-
PI 603420	CC	Landrace	II - MATURITY GROUP II
PI 437654	CC	Landrace	III - MATURITY GROUP III
PI 437679	CC	Landrace	IV - MATURITY GROUP IV
PI 578457A	CC	Landrace	VIII - MATURITY GROUP VIII
PI 438498	CC	Landrace	IV - MATURITY GROUP IV
PI 567298	CC	Landrace	V - MATURITY GROUP V
Hong Zhu Dou	CC	Landrace	-
Jin Shan Cha Zhu Shi Dou	CC	Landrace	-
He Dou	CC	Landrace	-
PI 437944	CC	Landrace	II - MATURITY GROUP II
PI 587666	CC	Landrace	VI - MATURITY GROUP VI
Sha Xian Wu Dou	CC	Landrace	-
PI 548456	CC	Landrace	VI - MATURITY GROUP VI
PI 86024	CC	Landrace	III - MATURITY GROUP III
Xiao Mi Dou	CC	Landrace	-
Xin Xian Xiao Huang Dou	CC	Landrace	-
PI 89138	CC	Landrace	II - MATURITY GROUP II
Bai Lu Dou	CC	Landrace	-
PI 548402	CC	Landrace	IV - MATURITY GROUP IV
PI 089772	CC	Landrace	IV - MATURITY GROUP IV
PI 090763	CC	Landrace	IV - MATURITY GROUP IV
PI 404166	CC	Landrace	III - MATURITY GROUP III
PI 424298	CC	Landrace	IV - MATURITY GROUP IV
PI 437655	CC	Landrace	III - MATURITY GROUP III
PI 567305	CC	Landrace	IV - MATURITY GROUP IV
PI 437654	CC	Landrace	III - MATURITY GROUP III
PI 567387	CC	Landrace	IV - MATURITY GROUP IV
PI 437725	CC	Landrace	IV - MATURITY GROUP IV
PI 437690	CC	Landrace	III - MATURITY GROUP III
PI 548402a	CC	Landrace	-
PI 088788	CC	Landrace	III - MATURITY GROUP III
PI 404198B	CC	Landrace	IV - MATURITY GROUP IV
PI 567516C	CC	Landrace	IV - MATURITY GROUP IV
PI 079691-4	CC	Landrace	III - MATURITY GROUP III
PI 407729	CC	Landrace	IV - MATURITY GROUP IV
PI 437679	CC	Landrace	IV - MATURITY GROUP IV
PI 548349	CC	Landrace	III - MATURITY GROUP III
PI 548415	CC	Landrace	IV - MATURITY GROUP IV
PI 549031	CC	Landrace	III - MATURITY GROUP III
PI 567230	CC	Landrace	V - MATURITY GROUP V
PI 567336B	CC	Landrace	IV - MATURITY GROUP IV
PI 567343	CC	Landrace	V - MATURITY GROUP V
PI 603497	CC	Landrace	III - MATURITY GROUP III
FC 31721	CC	Landrace	-
PI 417091	CC	Landrace	II - MATURITY GROUP II
Peking	CC	landrace	-
PI 96983	CC	Landrace	-
SOYhyuRCTDEAPE	CC	Landrace	-
PI 366121	TC	Glycine soja	IV - MATURITY GROUP IV
PI 562559	TC	Glycine soja	-
ZJ-Y155	TC	Glycine soja	-
PI 458536	TC	Glycine soja	0 - MATURITY GROUP 0
PI 407246	TC	Glycine soja	V - MATURITY GROUP V
PI 464929B	TC	Glycine soja	0 - MATURITY GROUP 0
PI 597461A	TC	Glycine soja	-
PI 407246	TC	Glycine soja	V - MATURITY GROUP V
PI 366121	TC	Glycine soja	IV - MATURITY GROUP IV
PI 458536	TC	Glycine soja	0 - MATURITY GROUP 0
PI 464929B	TC	Glycine soja	0 - MATURITY GROUP 0
