# Supplementary material for: Positional Cloning of the Flowering Time QTL qFT12-1 Reveals the Link Between the Clock Related PRR Homolog With Photoperiodic Response in Soybeans
Source: Front Plant Sci. 2019 Oct 15;10:1303. doi: 10.3389/fpls.2019.01303 (PMC6803524; doi:10.3389/fpls.2019.01303)
Supplement: Supplementary file 8 [file Table_6.xls]

## Sheet: LinkageMap
Supplementary Table S6 Linkage data for QTL IciMapping
SNP	chromosome	physical distance
Gm01_138835_A_G	1	0.138664
Gm01_565991_A_C	1	0.566214
Gm01_901691_C_T	1	0.901964
Gm01_963847_T_C	1	0.964171
Gm01_1279146_C_T	1	1.27389
Gm01_1307763_C_A	1	1.30251
Gm01_1314111_A_C	1	1.30885
Gm01_1315010_A_G	1	1.30975
Gm01_1342929_T_C	1	1.33767
Gm01_1344976_A_G	1	1.33977
Gm01_1355473_C_T	1	1.35022
Gm01_1378673_T_C	1	1.37347
Gm01_1384724_A_C	1	1.37952
Gm01_1502816_G_A	1	1.4988
Gm01_1653315_T_C	1	1.65357
Gm01_2585749_A_C	1	2.60174
Gm01_5159361_A_G	1	5.18127
Gm01_5300057_T_C	1	5.31344
Gm01_5453015_T_G	1	5.46635
Gm01_5555585_C_T	1	5.56893
Gm01_6754321_G_A	1	6.76758
Gm01_7052156_A_G	1	7.07114
Gm01_7507993_A_G	1	7.53612
Gm01_8484147_T_C	1	8.53345
Gm01_8822487_T_C	1	8.8691
Gm01_11835461_T_	1	11.872
Gm01_20542501_C_	1	19.0444
Gm01_21804377_G_	1	20.3056
Gm01_21883574_G_	1	20.3848
Gm01_23586582_C_	1	22.1231
Gm01_27463902_G_	1	25.9286
Gm01_28628358_A_	1	27.0989
Gm01_28759367_G_	1	27.2305
Gm01_28848622_A_	1	27.3197
Gm01_29169958_A_	1	27.6415
Gm01_30080907_T_	1	28.5677
Gm01_14097047_T_	1	29.2701
Gm01_14818197_C_	1	30.4423
Gm01_15851740_A_	1	31.2785
Gm01_16388569_G_	1	31.8046
Gm01_31506268_T_	1	32.8031
Gm01_31906055_A_	1	33.2032
Gm01_34560330_T_	1	35.9329
Gm01_38661096_A_	1	40.0404
Gm01_39724988_A_	1	41.0994
Gm01_40195425_G_	1	41.5867
Gm01_41403051_C_	1	42.2553
Gm01_41493471_T_	1	42.3378
Gm01_41828048_A_	1	42.6721
Gm01_42848317_T_	1	43.6941
Gm01_43106876_A_	1	43.9719
Gm01_43254220_T_	1	44.1175
Gm01_43413943_T_	1	44.2765
Gm01_43576945_G_	1	44.4424
Gm01_44304195_T_	1	45.1698
Gm01_47130768_A_	1	48.0063
Gm01_47505074_T_	1	48.3795
Gm01_49281276_T_	1	50.1645
Gm01_49322760_C_	1	50.2064
Gm01_49403702_A_	1	50.2872
Gm01_49412063_T_	1	50.2956
Gm01_49566893_G_	1	50.4511
Gm01_49987647_C_	1	50.872
Gm01_50262496_T_	1	51.1476
Gm01_52253980_C_	1	53.1411
Gm01_52642507_T_	1	53.5274
Gm01_53365928_A_	1	54.2506
Gm01_53570723_G_	1	54.4792
Gm01_53772846_G_	1	54.6813
Gm01_54220674_T_	1	55.1292
Gm01_54285824_G_	1	55.1943
Gm01_54432202_T_	1	55.3483
Gm01_54488416_C_	1	55.4048
Gm01_54686660_C_	1	55.603
Gm01_54932021_T_	1	55.8487
Gm01_54962372_G_	1	55.8791
Gm01_55060537_G_	1	55.9761
Gm01_55124547_G_	1	56.0402
Gm01_55226574_A_	1	56.1422
Gm01_55666300_G_	1	56.5823
Gm01_55751910_A_	1	56.6679
Gm01_55827001_C_	1	56.7431
Gm01_55854836_T_	1	56.7709
Gm02_207506_A_G	2	0.207529
Gm02_398525_C_A	2	0.398497
Gm02_504059_C_A	2	0.504031
Gm02_769809_G_A	2	0.769781
Gm02_971923_C_A	2	0.971944
Gm02_1574622_A_C	2	1.59852
Gm02_1830094_T_C	2	1.85363
Gm02_1878469_A_G	2	1.90199
Gm02_2061467_T_C	2	2.09216
Gm02_2158660_G_A	2	2.18935
Gm02_2391001_T_C	2	2.4217
Gm02_2467152_C_T	2	2.49787
Gm02_2736727_C_A	2	2.78418
Gm02_2834472_T_C	2	2.8819
Gm02_2885598_C_A	2	2.93303
Gm02_2920341_C_T	2	2.96777
Gm02_3316379_A_C	2	3.36681
Gm02_3623135_G_A	2	3.67493
Gm02_3667510_C_T	2	3.7193
Gm02_3860736_G_A	2	3.91252
Gm02_3906107_A_G	2	3.95789
Gm02_3954305_C_T	2	4.00604
Gm02_4319761_C_T	2	4.3715
Gm02_5456974_A_G	2	5.51526
Gm02_5640246_C_A	2	5.69862
Gm02_5929459_C_T	2	5.98856
Gm02_6340233_C_A	2	6.41652
Gm02_6418567_A_G	2	6.49486
Gm02_6821311_A_C	2	6.89903
Gm02_7219124_A_G	2	7.30661
Gm02_7435044_T_C	2	7.52248
Gm02_7721197_G_A	2	7.81042
Gm02_7790424_A_G	2	7.87969
Gm02_9795247_C_T	2	9.89409
Gm02_9873369_T_C	2	9.97226
Gm02_9990067_T_C	2	10.0694
Gm02_10074856_T_	2	10.1542
Gm02_10140292_A_	2	10.2196
Gm02_10200610_C_	2	10.2799
Gm02_10302121_G_	2	10.3814
Gm02_13117615_T_	2	13.4782
Gm02_13963693_C_	2	14.1616
Gm02_14022512_C_	2	14.2204
Gm02_14266842_G_	2	14.4705
Gm02_14715495_T_	2	14.918
Gm02_14817982_A_	2	15.0212
Gm02_14894202_A_	2	15.0974
Gm02_15213831_T_	2	15.4172
Gm02_15290331_G_	2	15.4937
Gm02_16287798_T_	2	16.5716
Gm02_25466460_A_	2	23.7406
Gm02_28331531_C_	2	25.4561
Gm02_30787675_T_	2	27.628
Gm02_32346915_G_	2	29.1754
Gm02_33608259_T_	2	30.5099
Gm02_34765594_A_	2	31.6657
Gm02_35348897_T_	2	32.2699
Gm02_35471507_A_	2	32.3928
Gm02_36666688_T_	2	32.8654
Gm02_36300454_T_	2	33.7691
Gm02_37441958_T_	2	34.3673
Gm02_38261529_G_	2	35.1845
Gm02_38843686_T_	2	35.7741
Gm02_39299266_A_	2	36.2191
Gm02_39548191_C_	2	36.4685
Gm02_40730869_T_	2	37.6504
Gm02_41505846_A_	2	38.4351
Gm02_41583970_C_	2	38.5128
Gm02_41788343_T_	2	38.7172
Gm02_41860500_T_	2	38.7893
Gm02_41931129_T_	2	38.86
Gm02_41979401_T_	2	38.9083
Gm02_42073855_G_	2	39.0027
Gm02_42204732_T_	2	39.1331
Gm02_42928916_T_	2	39.8527
Gm02_43641969_C_	2	40.5655
Gm02_43725963_A_	2	40.6498
Gm02_44033150_T_	2	40.9566
Gm02_44156636_G_	2	41.0801
Gm02_44190678_C_	2	41.1141
Gm02_44510528_T_	2	41.4329
Gm02_44574256_A_	2	41.4977
Gm02_44620331_A_	2	41.5441
Gm02_44863895_G_	2	41.7877
Gm02_45051600_A_	2	41.9755
Gm02_45088385_T_	2	42.0125
Gm02_45162941_A_	2	42.0881
Gm02_45183828_C_	2	42.109
Gm02_45366539_A_	2	42.2917
Gm02_45445720_T_	2	42.3708
Gm02_45533271_C_	2	42.4586
Gm02_45602331_C_	2	42.5275
Gm02_45940601_T_	2	42.8657
Gm02_47790307_C_	2	44.7029
Gm02_47853972_T_	2	44.7666
Gm02_48382122_G_	2	45.3033
Gm02_48583877_A_	2	45.5051
Gm02_48594877_C_	2	45.5161
Gm02_48821067_T_	2	45.7431
Gm02_48874048_G_	2	45.7958
Gm02_49069634_C_	2	45.992
Gm02_49126947_T_	2	46.0493
Gm02_49616128_C_	2	46.5379
Gm03_2373742_T_C	3	2.38344
Gm03_2818076_T_C	3	2.8464
Gm03_2892089_C_T	3	2.92113
Gm03_3087237_A_G	3	3.11512
Gm03_3164784_G_A	3	3.19269
Gm03_3225968_G_A	3	3.25404
Gm03_3334303_C_A	3	3.36225
Gm03_3497393_A_C	3	3.51728
Gm03_3907697_A_G	3	3.92947
Gm03_4467350_A_C	3	4.27656
Gm03_4468196_C_T	3	4.27735
Gm03_4483232_A_G	3	4.29239
Gm03_4487138_A_C	3	4.2963
Gm03_4551118_T_C	3	4.36035
Gm03_4587265_T_C	3	4.39649
Gm03_4602754_G_A	3	4.41198
Gm03_4629419_T_G	3	4.43865
Gm03_4638313_A_G	3	4.44749
Gm03_4665923_C_T	3	4.4751
Gm03_4685924_T_C	3	4.49511
Gm03_4695930_C_T	3	4.50507
Gm03_4788894_C_T	3	4.59801
Gm03_4821307_T_C	3	4.6306
Gm03_4833386_A_G	3	4.64268
Gm03_4838560_C_T	3	4.64786
Gm03_4888497_A_G	3	4.6978
Gm03_4901669_A_G	3	4.71092
Gm03_5020489_C_T	3	4.92334
Gm03_5106459_T_G	3	5.00931
Gm03_5217414_C_T	3	5.12026
Gm03_5341695_A_G	3	5.24415
Gm03_5451606_A_C	3	5.35411
Gm03_5500590_A_G	3	5.40379
Gm03_5502496_T_C	3	5.40574
Gm03_5733321_A_G	3	5.62193
Gm03_6459920_A_G	3	6.27889
Gm03_6844115_A_C	3	6.69215
Gm03_8003327_T_C	3	7.65034
Gm03_9789580_G_T	3	9.25947
Gm03_21347065_C_	3	17.6443
Gm03_35122599_C_	3	33.0825
Gm03_35201990_G_	3	33.1615
Gm03_35516341_C_	3	33.4773
Gm03_35556758_C_	3	33.5177
Gm03_36386316_G_	3	34.3643
Gm03_36396038_A_	3	34.374
Gm03_36438792_G_	3	34.4168
Gm03_36489202_C_	3	34.4673
Gm03_36714581_T_	3	34.6927
Gm03_36816006_A_	3	34.7918
Gm03_36863476_C_	3	34.8394
Gm03_37024877_C_	3	35.0008
Gm03_37963252_A_	3	35.9368
Gm03_38173815_A_	3	36.1473
Gm03_38263112_A_	3	36.237
Gm03_38862467_A_	3	36.8454
Gm03_38931849_C_	3	36.9144
Gm03_38976026_C_	3	36.9593
Gm03_39351009_C_	3	37.3334
Gm03_39574966_T_	3	37.557
Gm03_39796778_T_	3	37.7798
Gm03_39843152_T_	3	37.8262
Gm03_39945298_T_	3	37.9306
Gm03_39998708_A_	3	37.984
Gm03_40052612_T_	3	38.0379
Gm03_40115297_C_	3	38.1008
Gm03_40197155_A_	3	38.1831
Gm03_40270199_T_	3	38.2561
Gm03_40600088_A_	3	38.5859
Gm03_40727780_A_	3	38.7162
Gm03_41739860_T_	3	39.7279
Gm03_41984976_T_	3	39.9735
Gm03_43175147_G_	3	41.162
Gm03_43355787_C_	3	41.3426
Gm03_44326930_A_	3	42.3235
Gm03_44381016_G_	3	42.3776
Gm03_44920668_A_	3	42.9137
Gm03_45217524_G_	3	43.2132
Gm03_45488992_G_	3	43.4847
Gm03_45994991_T_	3	43.9913
Gm03_46055685_C_	3	44.0551
Gm03_46058803_C_	3	44.0581
Gm03_46060948_C_	3	44.0603
Gm03_46131061_T_	3	44.1304
Gm03_46159463_A_	3	44.1588
Gm03_46165054_A_	3	44.1644
Gm03_46172044_C_	3	44.1714
Gm03_46176864_T_	3	44.1762
Gm03_46209325_G_	3	44.2087
Gm03_46337339_T_	3	44.3368
Gm03_46508111_A_	3	44.5075
Gm03_46592189_A_	3	44.5916
Gm03_46998040_A_	3	44.9974
Gm03_47039930_T_	3	45.0394
Gm03_47106922_G_	3	45.1064
Gm03_47212539_T_	3	45.211
Gm04_1930897_T_C	4	1.98794
Gm04_2045637_T_C	4	2.10273
Gm04_2129696_T_C	4	2.18685
Gm04_2632511_T_G	4	2.69007
Gm04_2877511_T_C	4	2.93436
Gm04_2923894_G_A	4	2.98079
Gm04_4372365_G_T	4	4.42164
Gm04_4497001_T_C	4	4.54639
Gm04_4599981_G_T	4	4.64954
Gm04_5034406_T_C	4	5.09072
Gm04_6223324_T_C	4	6.29792
Gm04_6643461_A_G	4	6.71831
Gm04_7115824_A_G	4	7.19179
Gm04_7795928_A_G	4	7.86823
Gm04_7957588_G_T	4	8.0295
Gm04_8004029_C_A	4	8.07588
Gm04_8065917_C_T	4	8.13792
Gm04_8317828_G_A	4	8.38988
Gm04_8457367_T_C	4	8.52937
Gm04_8493767_T_C	4	8.56582
Gm04_8701289_A_G	4	8.77823
Gm04_8845668_G_T	4	8.92235
Gm04_9002718_G_A	4	9.07862
Gm04_9099671_A_G	4	9.17558
Gm04_9442969_T_C	4	9.51049
Gm04_9600878_C_A	4	9.67466
Gm04_9713316_G_A	4	9.78669
Gm04_9720640_G_A	4	9.79401
Gm04_11433919_T_	4	12.4738
Gm04_11936288_G_	4	12.9628
Gm04_12216645_G_	4	13.2556
Gm04_12283176_T_	4	13.3221
Gm04_12410533_A_	4	13.4997
Gm04_14549891_C_	4	15.5776
Gm04_15048603_A_	4	16.0846
Gm04_16244996_G_	4	17.2895
Gm04_16999532_T_	4	18.0237
Gm04_18000454_A_	4	19.1514
Gm04_18924971_G_	4	20.0728
Gm04_19107515_A_	4	20.2636
Gm04_32800373_C_	4	21.6763
Gm04_32209853_T_	4	22.2667
Gm04_32162384_C_	4	22.3142
Gm04_32065239_T_	4	22.4112
Gm04_32012103_T_	4	22.4644
Gm04_31931154_T_	4	22.5531
Gm04_31684476_A_	4	22.7994
Gm04_31563467_T_	4	22.9164
Gm04_31436577_C_	4	23.0263
Gm04_31267511_G_	4	23.1913
Gm04_31211384_C_	4	23.2474
Gm04_31181862_G_	4	23.2764
Gm04_31038638_T_	4	23.4456
Gm04_30800512_G_	4	23.6917
Gm04_30739677_A_	4	23.7526
Gm04_30618032_A_	4	23.8742
Gm04_30457043_A_	4	24.0314
Gm04_30420092_A_	4	24.0683
Gm04_30159368_C_	4	24.329
Gm04_30098720_A_	4	24.3897
Gm04_30058999_T_	4	24.4291
Gm12_18062812_A_	4	24.9717
Gm18_25169738_G_	4	25.6185
Gm18_26396917_A_	4	26.7877
Gm18_27207283_T_	4	27.5971
Gm04_20921247_T_	4	30.1237
Gm04_20796034_A_	4	30.2484
Gm04_20729591_G_	4	30.3147
Gm04_24086337_A_	4	32.5912
Gm04_24276060_G_	4	32.7821
Gm04_25230364_T_	4	33.7194
Gm04_28018833_G_	4	36.4809
Gm04_36357346_T_	4	39.4841
Gm04_36604337_A_	4	39.7312
Gm04_37126858_A_	4	40.2762
Gm04_37474521_G_	4	40.6241
Gm04_37799809_T_	4	40.9445
Gm04_38135736_T_	4	41.299
Gm04_38840391_A_	4	42.0021
Gm04_39087487_T_	4	42.2492
Gm04_39373584_G_	4	42.5213
Gm04_39753174_T_	4	42.9054
Gm04_40545788_G_	4	43.702
Gm04_40668983_A_	4	43.8295
Gm04_40811025_C_	4	43.9715
Gm04_40995323_A_	4	44.1423
Gm04_41071612_A_	4	44.2189
Gm04_42290567_T_	4	45.4353
Gm04_42459236_A_	4	45.6039
Gm04_42638631_T_	4	45.7834
Gm04_42754380_A_	4	45.8992
Gm04_42832910_C_	4	45.9777
Gm04_42951376_G_	4	46.0963
Gm04_43157873_A_	4	46.3027
Gm04_43390997_A_	4	46.5362
Gm04_43645980_A_	4	46.7939
Gm04_43738337_A_	4	46.8862
Gm04_43800862_C_	4	46.9487
Gm04_43966863_G_	4	47.1148
Gm04_44170480_C_	4	47.2966
Gm04_44220515_C_	4	47.3466
Gm04_44290827_T_	4	47.4169
Gm04_44518121_G_	4	47.648
Gm04_44746590_T_	4	47.8756
Gm04_44873112_T_	4	48.0021
Gm04_44924553_A_	4	48.0536
Gm04_45004787_A_	4	48.1338
Gm04_45146452_T_	4	48.2754
Gm04_45440686_T_	4	48.5697
Gm04_45857325_T_	4	48.986
Gm04_45999196_C_	4	49.1279
Gm04_46086046_G_	4	49.2142
Gm04_46280438_G_	4	49.4085
Gm04_46469835_C_	4	49.5979
Gm04_46873023_T_	4	50.0006
Gm04_46966383_G_	4	50.094
Gm04_47414790_G_	4	50.5459
Gm04_47540792_T_	4	50.6721
Gm04_47815130_T_	4	50.9464
Gm04_47957714_A_	4	51.0892
Gm04_48140577_G_	4	51.2721
Gm04_48198636_G_	4	51.3301
Gm04_48244118_G_	4	51.3755
Gm04_48354680_T_	4	51.4861
Gm04_48605014_T_	4	51.7365
Gm04_48670188_A_	4	51.8159
Gm04_48812166_A_	4	51.9579
Gm04_48922546_A_	4	52.0683
Gm04_48977363_C_	4	52.123
Gm04_49060197_T_	4	52.2058
Gm05_8597246_C_T	5	0.52375
Gm05_8562208_A_G	5	0.558788
Gm05_8525159_C_T	5	0.595837
Gm05_8492435_A_G	5	0.628498
Gm05_8295170_T_C	5	0.825759
Gm05_8074146_A_G	5	1.05032
Gm05_8031928_A_C	5	1.09259
Gm05_7766091_G_A	5	1.35853
Gm05_7714399_A_C	5	1.41027
Gm05_7681969_G_A	5	1.44265
Gm05_7588610_C_T	5	1.53606
Gm05_7542380_A_C	5	1.58229
Gm05_285672_T_C	5	1.96083
Gm05_492138_C_T	5	2.16736
Gm05_538322_G_T	5	2.21349
Gm05_682648_A_G	5	2.35785
Gm05_888436_A_G	5	2.56384
Gm05_1043092_G_T	5	2.7185
Gm05_1106905_A_G	5	2.78236
Gm05_1175804_G_A	5	2.85121
Gm05_1236013_A_C	5	2.91142
Gm05_1500111_G_A	5	3.21692
Gm05_1547102_C_T	5	3.26396
Gm05_1705841_A_G	5	3.42887
Gm05_1744708_G_A	5	3.46779
Gm05_1979844_C_A	5	3.7028
Gm05_2216235_A_G	5	3.93908
Gm05_2352061_C_T	5	4.07497
Gm05_2674662_T_G	5	4.39545
Gm05_2708074_T_C	5	4.42381
Gm05_2738064_T_C	5	4.4534
Gm05_2889929_A_G	5	4.60525
Gm05_3284858_A_G	5	5.00126
Gm05_3505412_G_A	5	5.22168
Gm05_3569588_T_C	5	5.28586
Gm05_3664732_A_G	5	5.38106
Gm05_3764264_C_T	5	5.48059
Gm05_3859212_C_T	5	5.57576
Gm05_3905135_T_C	5	5.62169
Gm05_4037530_A_G	5	5.75316
Gm05_4079565_C_T	5	5.79443
Gm05_7107494_T_C	5	8.82096
Gm05_16220329_T_	5	9.69869
Gm05_23799613_A_	5	24.1938
Gm05_26685967_G_	5	27.082
Gm05_26716419_G_	5	27.1125
Gm05_26773791_T_	5	27.1698
Gm05_27226936_A_	5	27.6239
Gm05_27342672_T_	5	27.7396
Gm05_27365188_A_	5	27.7622
Gm05_28856521_T_	5	29.2446
Gm05_29020658_G_	5	29.4091
Gm05_29489577_A_	5	29.8528
Gm05_29970914_A_	5	30.3347
Gm05_30976228_G_	5	31.2433
Gm05_31160955_A_	5	31.4276
Gm05_31274857_A_	5	31.5415
Gm05_31334797_C_	5	31.6014
Gm05_31454134_T_	5	31.7208
Gm05_31605772_A_	5	31.874
Gm05_31827868_T_	5	32.0958
Gm05_33075880_T_	5	33.3438
Gm05_33268964_T_	5	33.5364
Gm05_33472263_A_	5	33.7398
Gm05_33785297_T_	5	34.0541
Gm05_33929183_C_	5	34.1998
Gm05_34115366_T_	5	34.386
Gm05_34190449_C_	5	34.4611
Gm05_34234207_G_	5	34.5049
Gm05_34294649_G_	5	34.5653
Gm05_34620992_C_	5	34.8916
Gm05_34765648_A_	5	35.0364
Gm05_34830575_G_	5	35.1013
Gm05_34887900_A_	5	35.1586
Gm05_35039076_C_	5	35.3098
Gm05_35152904_T_	5	35.4236
Gm05_35196492_G_	5	35.4672
Gm05_35368098_A_	5	35.6388
Gm05_35450915_T_	5	35.722
Gm05_35754878_C_	5	36.026
Gm05_35860939_C_	5	36.1199
Gm05_36028909_A_	5	36.3118
Gm05_36115730_C_	5	36.3985
Gm05_36190383_A_	5	36.4731
Gm05_36429393_C_	5	36.7122
Gm05_36465301_T_	5	36.7481
Gm05_36558442_C_	5	36.8412
Gm05_36626022_A_	5	36.9178
Gm05_36749252_T_	5	37.0398
Gm05_36769351_T_	5	37.0594
Gm05_36849833_T_	5	37.1399
Gm05_37027716_G_	5	37.3175
Gm05_37071607_G_	5	37.3614
Gm05_37115396_A_	5	37.4055
Gm05_37260149_A_	5	37.5502
Gm05_37480785_T_	5	37.7707
Gm05_37592640_T_	5	37.8825
Gm05_37650940_T_	5	37.9409
Gm05_37848366_C_	5	38.1385
Gm05_37990846_C_	5	38.281
Gm05_41740936_C_	5	38.5975
Gm05_41658399_C_	5	38.6799
Gm05_41638179_T_	5	38.7001
Gm05_41446899_T_	5	38.891
Gm05_41151290_T_	5	39.1876
Gm05_41066968_A_	5	39.272
Gm05_40942868_G_	5	39.396
Gm05_40824886_T_	5	39.514
Gm05_40642754_C_	5	39.6961
Gm05_40517408_T_	5	39.8215
Gm05_40452052_G_	5	39.8868
Gm05_40349605_T_	5	39.9905
Gm05_39924642_C_	5	40.4154
Gm05_39858447_T_	5	40.4818
Gm05_39054172_A_	5	41.2947
Gm05_38674350_C_	5	41.6744
Gm05_38636402_G_	5	41.7124
Gm05_38596037_C_	5	41.7544
Gm05_38259743_A_	5	42.0907
Gm05_38231403_G_	5	42.119
Gm06_657590_T_G	6	0.669097
Gm06_1609551_C_T	6	1.62739
Gm06_1737718_C_T	6	1.75556
Gm06_2086304_T_C	6	2.10415
Gm06_2325487_G_T	6	2.35279
Gm06_2393421_A_G	6	2.42073
Gm06_2481084_A_G	6	2.50839
Gm06_2596995_A_G	6	2.62419
Gm06_2649771_A_G	6	2.67697
Gm06_2722611_C_T	6	2.74986
Gm06_2990241_A_G	6	3.01748
Gm06_3077486_G_A	6	3.10467
Gm06_3252579_T_C	6	3.27957
Gm06_3335673_A_G	6	3.36266
Gm06_3370143_T_C	6	3.39718
Gm06_3608127_T_C	6	3.64342
Gm06_4302100_C_T	6	4.33569
Gm06_4422517_A_G	6	4.45611
Gm06_4578291_T_G	6	4.58446
Gm06_4995087_A_G	6	5.00102
Gm06_5058345_A_G	6	5.06428
Gm06_5135025_A_G	6	5.14091
Gm06_9081030_C_A	6	9.087
Gm06_9216536_A_C	6	9.22717
Gm06_9442481_T_C	6	9.45304
Gm06_11844498_A_	6	11.8711
Gm06_11948808_G_	6	11.9754
Gm06_12129311_G_	6	12.1559
Gm06_12346248_C_	6	12.3728
Gm06_12914255_A_	6	12.9412
Gm06_13237698_A_	6	13.2646
Gm06_13318948_A_	6	13.3458
Gm06_13621986_A_	6	13.6492
Gm06_13881657_A_	6	13.9178
Gm06_14058543_A_	6	14.0946
Gm06_14138713_C_	6	14.1749
Gm06_14737902_A_	6	14.7809
Gm06_14924961_T_	6	14.9675
Gm06_15032691_A_	6	15.0749
Gm06_15115808_C_	6	15.158
Gm06_15453344_A_	6	15.4952
Gm06_15702934_A_	6	15.7456
Gm06_15793203_T_	6	15.8417
Gm06_15847484_A_	6	15.896
Gm06_16084283_C_	6	16.1332
Gm06_16133328_G_	6	16.1826
Gm06_16207402_T_	6	16.2567
Gm06_16669594_G_	6	16.7149
Gm06_16792113_T_	6	16.8374
Gm06_16853739_A_	6	16.899
Gm06_16923935_T_	6	16.9685
Gm06_18583273_A_	6	18.7885
Gm06_18766611_C_	6	18.97
Gm06_19282687_A_	6	19.4869
Gm06_19540686_C_	6	19.7449
Gm06_20370075_T_	6	20.5701
Gm06_21363243_A_	6	21.517
Gm06_22271239_C_	6	22.4788
Gm06_23462870_C_	6	23.4231
Gm06_25704938_T_	6	24.7237
Gm06_24160775_C_	6	26.8489
Gm06_28315232_G_	6	29.1856
Gm06_28816949_A_	6	29.6953
Gm06_30260912_A_	6	31.0854
Gm06_31863080_C_	6	32.7835
Gm06_32525220_G_	6	33.4551
Gm06_33615663_G_	6	34.5409
Gm06_34966793_A_	6	35.8864
Gm06_36058154_C_	6	36.9781
Gm06_36128279_T_	6	37.0627
Gm06_37364558_A_	6	38.0737
Gm06_37485859_A_	6	38.1951
Gm06_37732009_A_	6	38.4358
Gm06_37823440_T_	6	38.5275
Gm06_38232188_C_	6	38.9207
Gm06_38499465_G_	6	39.1881
Gm06_37017961_A_	6	39.2944
Gm06_38703918_T_	6	39.3994
Gm06_38999119_T_	6	39.6938
Gm06_39421942_C_	6	40.117
Gm06_40454884_C_	6	41.148
Gm06_40671903_G_	6	41.3766
Gm06_40878788_C_	6	41.5857
Gm06_41268682_G_	6	41.975
Gm06_42308631_A_	6	43.0646
Gm06_42515359_A_	6	43.2692
Gm06_42707931_T_	6	43.4618
Gm06_42883965_T_	6	43.6449
Gm06_43235059_C_	6	43.9968
Gm06_43980786_G_	6	44.5335
Gm06_46321637_C_	6	46.8554
Gm06_46564658_C_	6	47.1123
Gm06_46677140_C_	6	47.2243
Gm06_47191346_C_	6	47.7225
Gm06_47238226_A_	6	47.7694
Gm06_47550354_A_	6	48.0804
Gm06_47723155_T_	6	48.3442
Gm06_47764344_C_	6	48.3855
Gm06_47918999_G_	6	48.5491
Gm06_48037370_T_	6	48.6643
Gm06_48098064_A_	6	48.725
Gm06_48144110_G_	6	49.236
Gm06_48699388_T_	6	49.2895
Gm06_49209907_C_	6	49.8102
Gm06_49343224_G_	6	49.9439
Gm06_49570784_G_	6	50.1718
Gm06_49643463_G_	6	50.2445
Gm06_49722118_A_	6	50.3231
Gm06_49792083_T_	6	50.3938
Gm06_49915592_A_	6	50.5888
Gm06_50038514_T_	6	50.7113
Gm10_6020959_G_T	6	50.7889
Gm06_50143995_A_	6	50.8184
Gm06_50217611_T_	6	50.8923
Gm06_50453859_A_	6	51.1287
Gm06_50494802_A_	6	51.1697
Gm07_185603_C_T	7	0.190475
Gm07_675190_G_A	7	0.680007
Gm07_856859_T_C	7	0.860044
Gm07_954565_G_A	7	0.957697
Gm07_1034903_T_C	7	1.03743
Gm07_1119462_A_G	7	1.1219
Gm07_1336323_A_G	7	1.33852
Gm07_1421810_A_G	7	1.42395
Gm07_1534291_G_A	7	1.53648
Gm07_1667919_C_T	7	1.67009
Gm07_1703458_G_T	7	1.70558
Gm07_1749529_T_C	7	1.75165
Gm07_1808039_G_A	7	1.81021
Gm07_4837493_A_G	7	4.88532
Gm07_4892332_T_C	7	4.94011
Gm07_4921108_G_A	7	4.96882
Gm07_5016115_G_A	7	5.06383
Gm07_5067166_C_T	7	5.11491
Gm07_5075542_T_C	7	5.12328
Gm07_5143130_A_G	7	5.18193
Gm07_5143696_C_A	7	5.18244
Gm07_5152231_A_G	7	5.19098
Gm07_5175668_C_A	7	5.21441
Gm07_5213223_G_A	7	5.25197
Gm07_5222552_A_G	7	5.26135
Gm07_5226366_C_T	7	5.26511
Gm07_5330061_G_A	7	5.36883
Gm07_5352313_T_C	7	5.39113
Gm07_5383355_C_T	7	5.42201
Gm07_5413082_A_G	7	5.45174
Gm07_5417760_T_C	7	5.45642
Gm07_5457696_C_T	7	5.49636
Gm07_5495895_G_A	7	5.53451
Gm07_5504994_G_T	7	5.54366
Gm07_5835517_C_T	7	5.66221
Gm07_5601844_G_A	7	5.76352
Gm07_5603810_T_C	7	5.76549
Gm07_5636973_T_C	7	5.7987
Gm07_5650536_C_T	7	5.81222
Gm07_5863012_C_A	7	5.9013
Gm07_5900018_A_G	7	5.93831
Gm07_5922572_T_C	7	5.96086
Gm07_5944283_A_G	7	5.98295
Gm07_5951000_G_A	7	5.98966
Gm07_5957056_G_A	7	5.99567
Gm07_5961174_C_T	7	5.99979
Gm07_5974721_A_G	7	6.01333
Gm07_5989451_C_T	7	6.02806
Gm07_6016358_A_G	7	6.05502
Gm07_6148649_T_C	7	6.18726
Gm07_6154255_C_T	7	6.19286
Gm07_6178851_A_G	7	6.21746
Gm07_6375509_T_C	7	6.41413
Gm07_6405598_A_G	7	6.44422
Gm07_6452520_T_C	7	6.49114
Gm07_6781309_T_C	7	6.81993
Gm07_6947362_A_G	7	6.98559
Gm07_6986674_G_A	7	7.0249
Gm07_7032715_G_A	7	7.07099
Gm07_7207534_C_T	7	7.24587
Gm07_7284474_A_G	7	7.32375
Gm07_7369745_C_T	7	7.40911
Gm07_7579367_G_A	7	7.61871
Gm07_7666127_T_C	7	7.70553
Gm07_8112122_C_T	7	8.15148
Gm07_8166605_T_C	7	8.20598
Gm07_8385653_T_C	7	8.42571
Gm07_8748742_C_T	7	8.78967
Gm07_9102516_A_G	7	9.14348
Gm07_9402863_A_G	7	9.43989
Gm07_9535678_A_G	7	9.57267
Gm07_9774687_G_A	7	9.82074
Gm07_9800952_A_G	7	9.84705
Gm07_10193199_G_	7	10.2412
Gm07_10403810_C_	7	10.4535
Gm07_12858110_C_	7	12.4411
Gm07_11956773_T_	7	13.3468
Gm07_11762657_T_	7	13.5407
Gm07_11707828_T_	7	13.5946
Gm07_11153441_A_	7	14.1588
Gm07_10967802_C_	7	14.3443
Gm07_10926994_A_	7	14.3851
Gm07_10806729_G_	7	14.5054
Gm07_14979158_T_	7	15.0663
Gm07_15085661_G_	7	15.1727
Gm07_15590266_C_	7	15.6773
Gm07_15800472_A_	7	15.8875
Gm07_16020670_G_	7	16.1115
Gm07_16393117_A_	7	16.4861
Gm07_16438076_A_	7	16.5311
Gm07_16702758_C_	7	16.7885
Gm07_16809664_A_	7	16.8948
Gm07_16937302_T_	7	17.0225
Gm07_16979586_C_	7	17.0656
Gm07_17362808_A_	7	17.4494
Gm07_18293045_C_	7	18.3828
Gm07_18633505_T_	7	18.7231
Gm07_20527016_C_	7	20.6269
Gm07_21193861_G_	7	21.2555
Gm07_21217603_T_	7	21.2938
Gm07_24197913_T_	7	22.9702
Gm07_24960162_C_	7	25.0783
Gm07_26960074_A_	7	27.0117
Gm07_27445113_A_	7	27.503
Gm07_28865848_T_	7	28.9356
Gm07_30018015_T_	7	29.9466
Gm07_31363791_T_	7	31.2633
Gm07_32588864_T_	7	32.4844
Gm07_33333813_T_	7	33.2279
Gm07_34580678_G_	7	34.4511
Gm07_35547398_T_	7	35.4112
Gm07_35809061_C_	7	35.6851
Gm07_36285014_A_	7	36.1701
Gm07_36357080_T_	7	36.2452
Gm07_36483418_G_	7	36.3714
Gm07_36488859_C_	7	36.3769
Gm07_36498461_C_	7	36.3866
Gm07_36511460_T_	7	36.3996
Gm07_36534897_T_	7	36.4229
Gm07_36539495_C_	7	36.4276
Gm07_36540823_C_	7	36.4289
Gm07_36560926_C_	7	36.449
Gm07_36582520_T_	7	36.4706
Gm07_36634863_C_	7	36.5231
Gm07_36689110_G_	7	36.5819
Gm07_36875730_T_	7	36.7723
Gm07_36886320_G_	7	36.7829
Gm07_36898121_G_	7	36.7947
Gm07_36998381_T_	7	36.895
Gm07_37027659_C_	7	36.9243
Gm07_37030249_G_	7	36.9268
Gm07_37038775_T_	7	36.9354
Gm07_37049119_T_	7	36.9457
Gm07_37143613_T_	7	37.0492
Gm07_37193303_C_	7	37.0989
Gm07_37260926_G_	7	37.1665
Gm07_37374894_A_	7	37.2805
Gm07_37416258_G_	7	37.3219
Gm07_37543006_A_	7	37.4486
Gm07_37568123_T_	7	37.4738
Gm07_37576645_T_	7	37.4823
Gm07_37597168_A_	7	37.5028
Gm07_37610570_C_	7	37.5162
Gm07_37616450_A_	7	37.5221
Gm07_37642700_A_	7	37.5483
Gm07_37663221_C_	7	37.5687
Gm07_37666001_T_	7	37.5715
Gm07_37674266_T_	7	37.5798
Gm07_37679866_C_	7	37.5854
Gm07_37692424_C_	7	37.598
Gm07_37710555_C_	7	37.616
Gm07_37723292_G_	7	37.6288
Gm07_37724262_C_	7	37.6298
Gm07_37725698_A_	7	37.6312
Gm07_37731455_A_	7	37.6369
Gm07_37751796_G_	7	37.657
Gm07_37813869_A_	7	37.7191
Gm07_37876224_T_	7	37.7814
Gm07_38861000_C_	7	38.8201
Gm07_40784182_T_	7	40.7365
Gm07_41295979_A_	7	41.2468
Gm07_41746499_A_	7	41.6928
Gm07_42377015_T_	7	42.3233
Gm07_42643191_A_	7	42.589
Gm07_42851461_T_	7	42.7972
Gm07_42923420_G_	7	42.8691
Gm07_43311703_G_	7	43.2586
Gm07_43653918_A_	7	43.6007
Gm07_43803821_T_	7	43.7506
Gm07_44360334_A_	7	44.307
Gm07_44621109_A_	7	44.5678
Gm08_1187744_C_A	8	1.19028
Gm08_1370837_G_A	8	1.37315
Gm08_1923992_T_C	8	1.92729
Gm08_2041076_C_T	8	2.04471
Gm08_2119913_T_C	8	2.12369
Gm08_2288307_A_G	8	2.2922
Gm08_2467547_G_T	8	2.47109
Gm08_2547323_A_G	8	2.55087
Gm08_2622664_T_C	8	2.62615
Gm08_2671408_T_C	8	2.67495
Gm08_3519477_A_G	8	3.52378
Gm08_4667338_C_T	8	4.6735
Gm08_4747497_G_T	8	4.75368
Gm08_4873149_C_T	8	4.87933
Gm08_4882276_A_G	8	4.8884
Gm08_4959623_T_C	8	4.96575
Gm08_5003648_C_T	8	5.00983
Gm08_5082382_G_T	8	5.08856
Gm08_5278800_G_T	8	5.28788
Gm08_6188267_T_G	8	6.19609
Gm08_7103134_G_A	8	7.10864
Gm08_7135505_G_A	8	7.14237
Gm08_7180829_T_G	8	7.18765
Gm08_7520581_C_T	8	7.52718
Gm08_7567751_G_A	8	7.57415
Gm08_7589824_T_C	8	7.59622
Gm08_7598839_G_T	8	7.60518
Gm08_7714968_T_C	8	7.72134
Gm08_7780581_G_A	8	7.78703
Gm08_7792839_C_T	8	7.79934
Gm08_7808685_C_T	8	7.81518
Gm08_7856393_T_C	8	7.86284
Gm08_7876754_T_C	8	7.88325
Gm08_7939929_T_G	8	7.94643
Gm08_8013021_T_C	8	8.01738
Gm08_8185799_T_C	8	8.1901
Gm08_8227016_A_G	8	8.23131
Gm08_8267123_T_C	8	8.27142
Gm08_8268861_A_C	8	8.27316
Gm08_8272057_A_G	8	8.27641
Gm08_8281564_A_G	8	8.28591
Gm08_8286721_A_G	8	8.29107
Gm08_8471303_A_C	8	8.391
Gm08_8462762_T_G	8	8.39949
Gm08_8410761_G_A	8	8.45102
Gm08_8541523_G_T	8	8.57153
Gm08_8592791_A_C	8	8.62279
Gm08_8803704_A_C	8	8.79689
Gm08_9111316_G_A	8	9.10403
Gm08_9179927_T_C	8	9.17268
Gm08_9484695_T_C	8	9.47683
Gm08_9634993_A_C	8	9.62708
Gm08_9700052_T_G	8	9.69209
Gm08_9848168_T_C	8	9.84027
Gm08_10570097_C_	8	10.4828
Gm08_10670190_C_	8	10.5821
Gm08_11215154_C_	8	11.126
Gm08_11359720_A_	8	11.2706
Gm08_11730256_T_	8	11.6471
Gm08_11759489_C_	8	11.6764
Gm08_11864710_G_	8	11.7825
Gm08_12055669_A_	8	11.9732
Gm08_12189320_G_	8	12.1069
Gm08_12309919_A_	8	12.2275
Gm08_12392887_C_	8	12.3105
Gm08_12475844_A_	8	12.3934
Gm08_12513720_C_	8	12.4313
Gm08_12971742_G_	8	12.8984
Gm08_13040141_A_	8	12.9667
Gm08_13109130_A_	8	13.0357
Gm08_13236059_C_	8	13.1629
Gm08_13311178_A_	8	13.2381
Gm08_13459269_T_	8	13.3944
Gm08_13782412_C_	8	13.7171
Gm08_13914377_A_	8	13.8492
Gm08_14198186_G_	8	14.1289
Gm08_14233959_A_	8	14.1647
Gm08_14460902_T_	8	14.3915
Gm08_14497484_C_	8	14.4281
Gm08_14646649_A_	8	14.5771
Gm08_14781850_T_	8	14.7129
Gm08_14876508_C_	8	14.8075
Gm08_15193841_T_	8	15.1252
Gm08_15386438_A_	8	15.3177
Gm08_15538275_A_	8	15.4693
Gm08_15728680_T_	8	15.6454
Gm08_15829093_T_	8	15.7458
Gm08_15862930_A_	8	15.7804
Gm08_15928921_A_	8	15.8453
Gm08_16170136_C_	8	16.0948
Gm08_16256510_A_	8	16.1902
Gm08_17718826_A_	8	17.6536
Gm08_17813383_C_	8	17.7488
Gm08_17928709_C_	8	17.8643
Gm08_18101486_A_	8	18.0367
Gm08_18177939_C_	8	18.1131
Gm08_19117033_T_	8	19.063
Gm08_19162244_T_	8	19.1082
Gm08_19189540_G_	8	19.1355
Gm08_19226069_A_	8	19.172
Gm08_19292385_T_	8	19.2495
Gm08_19414487_A_	8	19.3715
Gm08_19525771_A_	8	19.4827
Gm08_19635121_T_	8	19.5921
Gm08_19793746_C_	8	19.7508
Gm08_19835719_T_	8	19.7931
Gm08_19887196_G_	8	19.8446
Gm08_20536534_C_	8	20.4937
Gm08_20843054_C_	8	20.8002
Gm08_21170988_C_	8	21.1278
Gm08_21172458_T_	8	21.1292
Gm08_21425355_G_	8	21.3807
Gm08_21443387_G_	8	21.3988
Gm08_38995907_A_	8	39.6298
Gm08_39004896_A_	8	39.6388
Gm08_39075224_T_	8	39.7091
Gm08_39080707_A_	8	39.7146
Gm08_39153322_G_	8	39.7873
Gm08_39177955_G_	8	39.8119
Gm08_39242211_A_	8	39.8762
Gm08_39249467_C_	8	39.8834
Gm08_39270972_T_	8	39.9049
Gm08_39284892_C_	8	39.9188
Gm08_39362804_G_	8	39.997
Gm08_39378185_T_	8	40.0123
Gm08_39379404_A_	8	40.0136
Gm08_39432478_G_	8	40.0666
Gm08_39432625_G_	8	40.0668
Gm08_39453750_G_	8	40.0879
Gm08_39516251_C_	8	40.151
Gm08_39517661_T_	8	40.1525
Gm08_39540063_A_	8	40.1742
Gm08_39543860_T_	8	40.1779
Gm08_39547916_C_	8	40.182
Gm08_39549413_C_	8	40.1835
Gm08_39552229_G_	8	40.1863
Gm08_39583225_T_	8	40.2173
Gm08_39587082_T_	8	40.2212
Gm08_39589524_A_	8	40.2235
Gm08_39591671_G_	8	40.2257
Gm08_39603034_T_	8	40.2354
Gm08_39636574_C_	8	40.2695
Gm08_39638583_T_	8	40.2715
Gm08_39641406_T_	8	40.2744
Gm08_39652259_A_	8	40.2852
Gm08_39660788_T_	8	40.2937
Gm08_39666201_G_	8	40.2991
Gm08_39695933_A_	8	40.3289
Gm08_39707778_A_	8	40.3407
Gm08_39854743_C_	8	40.4831
Gm08_39914508_C_	8	40.5429
Gm08_40012659_C_	8	40.641
Gm08_40020347_C_	8	40.6487
Gm08_40092444_A_	8	40.7208
Gm08_40102304_C_	8	40.7306
Gm08_40303964_C_	8	40.9402
Gm08_40316209_C_	8	40.9525
Gm08_40401190_A_	8	41.0375
Gm08_40414647_A_	8	41.051
Gm08_40414816_A_	8	41.0511
Gm08_40417752_A_	8	41.0541
Gm08_40521512_A_	8	41.1573
Gm08_40534265_A_	8	41.1701
Gm08_40589333_T_	8	41.2251
Gm08_40693055_A_	8	41.3288
Gm08_40709662_T_	8	41.3455
Gm08_40729831_A_	8	41.3656
Gm08_40731158_T_	8	41.367
Gm08_40732366_A_	8	41.3682
Gm08_40733015_A_	8	41.3688
Gm08_40734177_T_	8	41.3699
Gm08_40734428_A_	8	41.3702
Gm08_40734513_T_	8	41.3703
Gm08_40734961_G_	8	41.3707
Gm08_40735987_T_	8	41.3718
Gm08_40748971_C_	8	41.3847
Gm08_40758004_T_	8	41.3938
Gm08_40761790_T_	8	41.3976
Gm08_40762332_A_	8	41.3981
Gm08_40764211_T_	8	41.4
Gm08_40764369_G_	8	41.4001
Gm08_40766548_G_	8	41.4024
Gm08_40801297_C_	8	41.4371
Gm08_40881149_A_	8	41.5169
Gm08_40881278_T_	8	41.5171
Gm08_40881468_T_	8	41.5173
Gm08_40881560_T_	8	41.5174
Gm08_40882335_A_	8	41.5181
Gm08_40883682_C_	8	41.5195
Gm08_40883864_C_	8	41.5197
Gm08_40884892_A_	8	41.5207
Gm08_40953721_T_	8	41.5895
Gm08_40964275_G_	8	41.6001
Gm08_40997656_A_	8	41.6425
Gm08_41102916_G_	8	41.7461
Gm08_41126169_A_	8	41.7691
Gm08_41129236_T_	8	41.7722
Gm08_41150284_A_	8	41.7925
Gm08_41153984_C_	8	41.7961
Gm08_41154140_C_	8	41.7963
Gm08_41254477_G_	8	41.8967
Gm08_41278528_T_	8	41.9207
Gm08_41283468_A_	8	41.9257
Gm08_41285727_T_	8	41.9279
Gm08_41286286_T_	8	41.9284
Gm08_41296381_T_	8	41.9385
Gm08_41318101_A_	8	41.9602
Gm08_41427473_A_	8	42.0693
Gm08_41453586_T_	8	42.0954
Gm08_41504420_T_	8	42.1463
Gm08_41553888_G_	8	42.1957
Gm08_41615045_T_	8	42.2569
Gm08_41673344_T_	8	42.3157
Gm08_41694875_G_	8	42.3358
Gm08_41798055_A_	8	42.4391
Gm08_41807810_A_	8	42.4488
Gm08_41814267_A_	8	42.4551
Gm08_41825010_T_	8	42.4659
Gm08_41844881_T_	8	42.4857
Gm08_41850395_C_	8	42.4913
Gm08_41929233_A_	8	42.5789
Gm08_42056397_T_	8	42.7079
Gm08_42457562_G_	8	43.1135
Gm08_42541896_C_	8	43.369
Gm08_42711337_T_	8	43.5376
Gm08_42757127_T_	8	43.5834
Gm08_42859155_A_	8	43.6851
Gm08_42937574_T_	8	43.7637
Gm08_43306749_C_	8	44.1417
Gm08_43345646_C_	8	44.1806
Gm08_43659174_C_	8	44.4944
Gm08_43896783_C_	8	44.732
Gm08_44087748_G_	8	44.9249
Gm08_44181366_G_	8	45.0186
Gm08_44588048_T_	8	45.1845
Gm08_44509647_C_	8	45.2624
Gm08_44368268_A_	8	45.4037
Gm08_44751317_C_	8	45.6035
Gm08_44927121_T_	8	45.7796
Gm08_45060561_C_	8	45.9131
Gm08_45590964_A_	8	46.4435
Gm08_45693636_A_	8	46.5462
Gm08_45697460_T_	8	46.55
Gm08_45893888_T_	8	46.7449
Gm08_45981724_G_	8	46.8329
Gm09_611923_A_G	9	0.613751
Gm09_720803_C_T	9	0.722562
Gm09_998472_G_A	9	1.00024
Gm09_1111460_T_C	9	1.12614
Gm09_1251128_T_C	9	1.26595
Gm09_1320051_G_A	9	1.33492
Gm09_1397467_C_T	9	1.41233
Gm09_1518813_G_A	9	1.53434
Gm09_1522327_T_C	9	1.5378
Gm09_1888876_A_G	9	1.90414
Gm09_2327785_G_A	9	2.34289
Gm09_2386432_G_A	9	2.40154
Gm09_2685308_G_A	9	2.70886
Gm09_2784336_T_G	9	2.82481
Gm09_3174245_A_G	9	3.21554
Gm09_3295777_T_G	9	3.33725
Gm09_3658288_T_C	9	3.70043
Gm09_3708901_T_C	9	3.7511
Gm09_4404144_C_T	9	4.44644
Gm09_4517002_T_C	9	4.55925
Gm09_4799335_A_C	9	4.84254
Gm09_5122231_A_G	9	5.17112
Gm09_5266408_T_G	9	5.31524
Gm09_5979646_C_T	9	6.02779
Gm09_6243152_A_G	9	6.2012
Gm09_6664095_T_C	9	6.62141
Gm09_6676869_A_G	9	6.63419
Gm09_6729236_C_T	9	6.68941
Gm09_6968486_G_A	9	6.92928
Gm09_7072195_T_C	9	7.03306
Gm09_7953606_G_T	9	7.91814
Gm09_7983364_A_G	9	7.95189
Gm09_8251351_A_G	9	8.20325
Gm09_8831480_A_G	9	8.78439
Gm09_8984771_A_G	9	8.93472
Gm09_10520180_T_	9	10.4796
Gm09_11854826_G_	9	11.8159
Gm09_12093815_T_	9	12.0549
Gm09_12240541_C_	9	12.2019
Gm01_40455897_T_	9	20.1827
Gm01_40429688_T_	9	20.2089
Gm09_27092089_A_	9	29.5765
Gm09_28591445_T_	9	31.202
Gm09_28853477_A_	9	31.4595
Gm09_29782119_G_	9	32.3886
Gm09_29846764_C_	9	32.4523
Gm09_33894091_A_	9	36.455
Gm09_34830637_A_	9	37.3915
Gm09_35444887_C_	9	38.0186
Gm09_35869237_T_	9	38.4301
Gm09_35962679_T_	9	38.5234
Gm09_36586870_C_	9	39.1601
Gm09_36869408_A_	9	39.4431
Gm09_37128030_A_	9	39.7019
Gm09_37232958_C_	9	39.8068
Gm09_37249978_A_	9	39.8239
Gm09_37329610_G_	9	39.9035
Gm09_37754494_G_	9	40.3491
Gm09_37808071_A_	9	40.4027
Gm09_37823866_T_	9	40.4183
Gm09_38013391_A_	9	40.6087
Gm09_38168295_T_	9	40.7695
Gm13_35248287_A_	9	40.9645
Gm09_38676111_A_	9	41.3543
Gm09_38771421_G_	9	41.4493
Gm09_39067581_G_	9	41.7455
Gm09_39225332_G_	9	41.9032
Gm09_39447611_G_	9	42.1249
Gm09_39605825_C_	9	42.2831
Gm09_39693036_C_	9	42.3701
Gm09_40407114_C_	9	43.0842
Gm09_40535562_T_	9	43.2127
Gm09_40638454_A_	9	43.3153
Gm09_40706793_A_	9	43.4017
Gm09_40822345_T_	9	43.5173
Gm09_40899791_G_	9	43.614
Gm09_41103872_T_	9	43.8183
Gm09_41253226_T_	9	43.969
Gm09_41389071_G_	9	44.1048
Gm09_41548661_T_	9	44.2644
Gm09_41694621_C_	9	44.8907
Gm09_41861265_C_	9	45.0573
Gm09_41974247_T_	9	45.1704
Gm09_42181997_A_	9	45.3781
Gm09_42241644_G_	9	45.4378
Gm09_42452071_T_	9	45.6482
Gm09_42679986_C_	9	45.8851
Gm09_42974503_G_	9	46.1793
Gm09_43200347_A_	9	46.4051
Gm09_43370976_T_	9	46.5757
Gm09_43613729_C_	9	46.8186
Gm09_43820536_T_	9	47.0254
Gm09_44266451_T_	9	47.4668
Gm10_214458_C_T	10	0.209931
Gm10_711291_G_A	10	0.706112
Gm10_925972_C_T	10	0.92168
Gm10_981062_A_G	10	0.976837
Gm10_1232205_A_G	10	1.22796
Gm10_1268065_G_A	10	1.26377
Gm10_1341309_G_A	10	1.33687
Gm10_1388577_T_C	10	1.39314
Gm10_1667248_A_G	10	1.67188
Gm10_1895532_C_T	10	1.90306
Gm10_2141065_A_G	10	2.14864
Gm10_2317882_A_G	10	2.32586
Gm10_2382139_A_C	10	2.39012
Gm10_2583564_G_A	10	2.59159
Gm10_2973699_T_C	10	2.98173
Gm10_3022221_T_C	10	3.03001
Gm10_3375821_T_C	10	3.38429
Gm10_3426604_G_A	10	3.43513
Gm10_3840102_T_C	10	3.8575
Gm10_3896284_A_G	10	3.91369
Gm10_4035277_A_C	10	4.05268
Gm10_4218276_T_C	10	4.23494
Gm10_4337334_T_C	10	4.35394
Gm10_4360182_A_G	10	4.37684
Gm10_4458104_G_A	10	4.47471
Gm10_4814162_C_T	10	4.8333
Gm10_4892612_G_A	10	4.91145
Gm10_4972351_T_C	10	4.99106
Gm10_5206933_A_C	10	5.22903
Gm10_5404728_C_A	10	5.43653
Gm10_5556984_A_G	10	5.58885
Gm10_6663940_T_C	10	6.70035
Gm10_6735414_C_T	10	6.77182
Gm10_6837973_T_C	10	6.87486
Gm10_37762178_C_	10	38.2866
Gm10_37793479_C_	10	38.3179
Gm10_38025918_A_	10	38.5507
Gm10_38105991_T_	10	38.64
Gm10_38900522_T_	10	39.4487
Gm10_38986661_A_	10	39.5439
Gm10_39771689_T_	10	40.3291
Gm10_39827303_A_	10	40.3847
Gm10_39937578_G_	10	40.497
Gm10_40177184_T_	10	40.7367
Gm10_40258740_G_	10	40.8182
Gm10_40692799_T_	10	41.2262
Gm10_40784262_C_	10	41.3165
Gm10_41958155_A_	10	42.5228
Gm10_43107961_A_	10	43.6866
Gm10_43178809_G_	10	43.7575
Gm10_43894668_A_	10	44.4748
Gm10_44553009_T_	10	45.131
Gm10_44558639_T_	10	45.1366
Gm10_44563220_A_	10	45.1412
Gm10_44574663_C_	10	45.1526
Gm10_44579722_A_	10	45.1577
Gm10_45051560_T_	10	45.6295
Gm10_45141082_A_	10	45.7222
Gm10_45670539_T_	10	46.2418
Gm10_45863169_A_	10	46.4345
Gm10_45890133_C_	10	46.4614
Gm10_46069887_A_	10	46.6393
Gm10_46788615_A_	10	47.3848
Gm10_47656484_T_	10	48.2521
Gm10_47733469_G_	10	48.3292
Gm11_423298_C_T	11	0.432259
Gm11_614313_A_G	11	0.623262
Gm11_667752_C_T	11	0.676701
Gm11_2092125_G_A	11	2.10047
Gm11_2167393_G_A	11	2.17579
Gm11_4216279_A_G	11	4.22598
Gm11_4345198_G_A	11	4.3546
Gm11_4408645_C_T	11	4.41805
Gm11_4453218_T_C	11	4.46262
Gm11_4866335_T_C	11	4.87591
Gm11_4961902_C_T	11	4.97148
Gm11_5238788_G_A	11	5.24823
Gm11_5293932_C_T	11	5.30337
Gm11_5661230_T_C	11	5.67034
Gm11_5875855_C_T	11	5.88491
Gm11_5948859_T_C	11	5.95791
Gm11_5983320_C_T	11	5.99242
Gm11_6383207_G_A	11	6.39337
Gm11_6512939_G_A	11	6.52311
Gm11_6619367_T_C	11	6.62953
Gm11_6780396_C_T	11	6.79037
Gm11_6882885_T_G	11	6.89285
Gm11_6901726_C_T	11	6.91169
Gm11_6906614_A_G	11	6.91663
Gm11_8363320_T_C	11	8.37379
Gm11_8556791_G_A	11	8.56721
Gm11_9038408_C_A	11	9.0577
Gm11_9666296_T_G	11	9.69565
Gm11_17417230_A_	11	11.3125
Gm11_24186948_A_	11	13.719
Gm11_30902153_T_	11	14.9091
Gm11_23209753_T_	11	24.0886
Gm11_33511924_C_	11	28.6862
Gm11_36293058_A_	11	31.8179
Gm11_36518427_A_	11	32.0433
Gm11_36778892_C_	11	32.322
Gm11_36931482_C_	11	32.4744
Gm11_37106045_C_	11	32.654
Gm11_37291736_G_	11	32.8432
Gm11_37710966_A_	11	33.2616
Gm11_39031139_T_	11	33.5022
Gm11_38892011_G_	11	33.6413
Gm11_38424068_C_	11	34.1099
Gm11_38299330_T_	11	34.2346
Gm11_38261784_G_	11	34.2721
Gm11_38136659_T_	11	34.3971
Gm11_37978746_G_	11	34.555
Gm12_128224_C_T	12	0.13315
Gm12_405621_A_C	12	0.410615
Gm12_506863_G_A	12	0.511856
Gm12_849243_A_G	12	0.854186
Gm12_1070930_T_C	12	1.07587
Gm12_1161576_T_C	12	1.16651
Gm12_1374970_T_C	12	1.37985
Gm12_1433336_C_A	12	1.43828
Gm12_1531850_T_C	12	1.53674
Gm12_1632399_G_A	12	1.63729
Gm12_2847459_G_A	12	2.84382
Gm12_2975576_T_C	12	2.98099
Gm12_3133148_T_C	12	3.13857
Gm12_3175818_A_G	12	3.18124
Gm12_3296301_T_G	12	3.30198
Gm12_3309895_G_A	12	3.31557
Gm12_3459699_C_T	12	3.46522
Gm12_3587852_T_C	12	3.59337
Gm12_3663850_A_G	12	3.66941
Gm12_3843573_G_A	12	3.84908
Gm12_4025840_T_G	12	4.03105
Gm12_4268262_G_A	12	4.26891
Gm12_4363882_T_C	12	4.36445
Gm12_4592200_C_T	12	4.59274
Gm12_4670638_A_C	12	4.67116
Gm12_5230528_G_A	12	5.23878
Gm12_5309573_G_A	12	5.3179
Gm12_5392662_C_T	12	5.40094
Gm12_5475411_T_C	12	5.48633
Gm12_5610878_T_C	12	5.62218
Gm12_5706745_G_A	12	5.71824
Gm12_5786241_A_G	12	5.79768
Gm12_6023395_T_C	12	6.05226
Gm12_6150215_A_G	12	6.17913
Gm12_6195964_C_T	12	6.22488
Gm12_6295017_A_C	12	6.32428
Gm12_6407458_T_C	12	6.43677
Gm12_6663270_C_T	12	6.69454
Gm12_6892713_T_C	12	6.93124
Gm12_6932978_G_A	12	6.9715
Gm12_7162872_G_A	12	7.20151
Gm12_7270512_G_A	12	7.30915
Gm12_7316668_A_G	12	7.35536
Gm12_7325785_A_G	12	7.36442
Gm12_7374946_T_C	12	7.41359
Gm12_7405074_C_T	12	7.44377
Gm12_7436103_T_G	12	7.4748
Gm12_7753259_T_C	12	7.79154
Gm12_7855367_G_A	12	7.89357
Gm12_8188220_T_C	12	8.22509
Gm12_8435100_T_C	12	8.46874
Gm12_8469462_T_C	12	8.50504
Gm12_8642414_G_A	12	8.67794
Gm12_8844839_T_G	12	8.88041
Gm12_8891405_A_G	12	8.92573
Gm12_9023940_A_C	12	9.05903
Gm12_9153986_G_A	12	9.18909
Gm12_9515376_A_G	12	9.5508
Gm12_9840192_G_A	12	9.88332
Gm12_10933346_T_	12	11.0067
Gm12_10990594_C_	12	11.064
Gm12_11177435_T_	12	11.252
Gm12_11325625_T_	12	11.4007
Gm12_14231203_C_	12	14.3063
Gm12_14736851_A_	12	14.8246
Gm12_15451614_G_	12	15.5552
Gm12_15514114_G_	12	15.6188
Gm12_15877490_A_	12	15.9835
Gm12_16787022_G_	12	16.8775
Gm12_24320821_T_	12	20.524
Gm12_25839577_G_	12	22.0406
Gm12_32582310_T_	12	32.5395
Gm12_32734395_T_	12	32.691
Gm12_32771353_A_	12	32.7275
Gm12_33110081_G_	12	33.0675
Gm12_33218465_T_	12	33.1759
Gm12_33680937_A_	12	33.6378
Gm12_33815566_A_	12	33.7767
Gm12_33892140_G_	12	33.8533
Gm12_34102452_G_	12	34.0632
Gm12_34217043_C_	12	34.1782
Gm12_34289684_C_	12	34.2509
Gm12_34421239_A_	12	34.3827
Gm12_34591501_C_	12	34.5529
Gm12_34776200_C_	12	34.7372
Gm12_34892779_T_	12	34.8669
Gm12_35525603_A_	12	35.4996
Gm12_35586020_G_	12	35.5599
Gm12_36002148_G_	12	35.9929
Gm12_39156556_T_	12	39.1316
Gm12_39240113_C_	12	39.2151
Gm12_39289776_T_	12	39.2648
Gm12_39420263_T_	12	39.396
Gm12_39490812_G_	12	39.4665
Gm12_39632863_C_	12	39.6086
Gm12_39886487_G_	12	39.8646
Gm13_12045535_T_	13	0.324545
Gm13_12158356_T_	13	0.437261
Gm13_12489810_T_	13	0.768699
Gm13_12606881_T_	13	0.885821
Gm13_12658772_G_	13	0.937661
Gm13_12763942_C_	13	1.03533
Gm13_13159950_C_	13	1.43883
Gm13_13756682_A_	13	2.05587
Gm13_15583636_A_	13	4.15711
Gm13_16721293_A_	13	5.25594
Gm13_17652991_A_	13	6.18534
Gm13_18597519_C_	13	8.09266
Gm02_26182810_A_	13	8.94202
Gm02_27295513_G_	13	10.0717
Gm13_11577812_A_	13	10.3108
Gm13_11463853_T_	13	10.4236
Gm13_11040574_A_	13	10.8517
Gm13_11000595_A_	13	10.8917
Gm13_10759545_A_	13	11.1304
Gm13_10630165_T_	13	11.2594
Gm13_10487933_C_	13	11.4018
Gm13_10442448_C_	13	11.4473
Gm13_9753065_C_T	13	12.1083
Gm13_9720162_T_G	13	12.1412
Gm13_9670164_A_G	13	12.1912
Gm13_9483078_A_G	13	12.3783
Gm13_9332417_T_C	13	12.5287
Gm13_8587714_T_C	13	13.273
Gm13_8529479_G_T	13	13.331
Gm13_8308962_C_A	13	13.5508
Gm13_8258663_C_A	13	13.6012
Gm13_8223128_A_G	13	13.6364
Gm13_8133795_A_C	13	13.7213
Gm13_8106523_C_T	13	13.7486
Gm13_8044383_G_A	13	13.8107
Gm13_8035911_A_G	13	13.8192
Gm13_7999187_T_C	13	13.8559
Gm13_7989576_A_G	13	13.8655
Gm13_7984096_A_G	13	13.871
Gm13_7959629_T_C	13	13.893
Gm13_7935638_T_C	13	13.917
Gm13_7918693_T_C	13	13.934
Gm13_7812489_C_T	13	14.0395
Gm13_7810247_C_T	13	14.0417
Gm13_7805648_T_C	13	14.0463
Gm13_7757951_G_A	13	14.094
Gm13_7727522_C_T	13	14.1242
Gm13_7570910_A_G	13	14.2809
Gm13_7559523_G_A	13	14.2923
Gm13_7553443_A_G	13	14.2984
Gm13_7381714_A_G	13	14.4706
Gm13_7369055_C_T	13	14.4834
Gm13_7354441_G_A	13	14.4978
Gm13_7326545_G_A	13	14.5257
Gm13_7319355_A_G	13	14.5329
Gm13_7315113_T_C	13	14.5371
Gm13_7285098_T_C	13	14.5672
Gm13_7237432_C_A	13	14.614
Gm13_7222644_C_T	13	14.6288
Gm13_7201861_G_A	13	14.6496
Gm13_6902381_C_T	13	14.9852
Gm13_6854351_T_G	13	15.0334
Gm13_6831560_C_T	13	15.0562
Gm13_6659878_T_C	13	15.2263
Gm13_6598000_C_A	13	15.2889
Gm13_6591195_C_A	13	15.2957
Gm13_6509852_C_T	13	15.3771
Gm13_6497812_T_C	13	15.3891
Gm13_6391026_G_T	13	15.4955
Gm13_6390360_A_G	13	15.4962
Gm13_6342969_T_C	13	15.5436
Gm13_6151892_T_C	13	15.6798
Gm13_6072061_C_A	13	15.7596
Gm13_5993892_T_C	13	15.8344
Gm13_5769177_G_A	13	16.0518
Gm13_5674534_C_T	13	16.1464
Gm13_5480962_C_T	13	16.3507
Gm13_5259517_G_A	13	16.5722
Gm13_4739271_T_C	13	17.1251
Gm13_4319851_T_G	13	17.55
Gm13_4187551_A_G	13	17.6816
Gm13_3620512_G_A	13	18.2487
Gm13_3224370_T_C	13	18.6447
Gm13_3175654_A_G	13	18.6934
Gm13_3010849_A_G	13	18.8574
Gm13_2993802_T_C	13	18.8733
Gm13_2911344_A_G	13	18.9558
Gm13_2833623_T_C	13	19.0335
Gm13_2758183_T_C	13	19.109
Gm13_2685315_A_C	13	19.1819
Gm13_2558742_C_T	13	19.3085
Gm13_2270752_T_C	13	19.597
Gm13_1624949_C_A	13	20.2427
Gm13_1267672_T_C	13	20.597
Gm13_579178_A_G	13	21.2855
Gm13_344320_G_A	13	21.5166
Gm11_34928092_A_	13	26.7177
Gm13_27132590_C_	13	28.3247
Gm13_27212330_G_	13	28.4045
Gm13_27257076_C_	13	28.4493
Gm13_27302662_C_	13	28.4963
Gm13_27373181_G_	13	28.5667
Gm13_27418207_G_	13	28.6118
Gm13_27485765_T_	13	28.6793
Gm13_27665585_A_	13	28.8597
Gm13_28141969_T_	13	29.3354
Gm13_28206014_A_	13	29.3994
Gm13_28252435_A_	13	29.4458
Gm13_28323043_C_	13	29.5167
Gm13_28544194_T_	13	29.7419
Gm13_29042122_C_	13	30.2418
Gm13_29123830_C_	13	30.3235
Gm13_29267357_A_	13	30.4675
Gm13_29375136_A_	13	30.5753
Gm13_29481243_C_	13	30.6814
Gm13_29677928_G_	13	30.8756
Gm13_29808335_C_	13	31.0059
Gm13_29858691_C_	13	31.0404
Gm13_29941083_T_	13	31.1227
Gm13_30078140_A_	13	31.2592
Gm13_30268845_G_	13	31.4491
Gm13_30310888_T_	13	31.5147
Gm13_30351547_A_	13	31.5552
Gm13_30479725_C_	13	31.6919
Gm13_30744043_A_	13	31.9564
Gm13_30792419_T_	13	32.0048
Gm13_30896864_A_	13	32.1093
Gm13_31079210_G_	13	32.2917
Gm13_31934756_G_	13	33.1465
Gm13_32100739_A_	13	33.3125
Gm13_32171109_G_	13	33.3829
Gm13_32435575_G_	13	33.6474
Gm13_32712123_C_	13	33.9237
Gm13_32795953_T_	13	34.008
Gm13_32875289_C_	13	34.0874
Gm13_33004100_T_	13	34.2162
Gm13_33027247_T_	13	34.2394
Gm13_33113825_A_	13	34.3259
Gm13_33124381_A_	13	34.3364
Gm13_33302559_G_	13	34.5146
Gm13_33306556_A_	13	34.5186
Gm13_33471044_G_	13	34.6831
Gm13_33597361_T_	13	34.8094
Gm13_34248212_T_	13	35.4604
Gm13_36031702_T_	13	37.1729
Gm13_36073020_C_	13	37.2141
Gm13_36261107_T_	13	37.402
Gm13_36316916_C_	13	37.4579
Gm13_36499791_T_	13	37.6407
Gm13_36551803_C_	13	37.6927
Gm13_36886485_G_	13	38.0277
Gm13_37204738_A_	13	38.3667
Gm13_37339900_C_	13	38.5019
Gm13_38032737_G_	13	39.2102
Gm13_38133840_A_	13	39.3113
Gm13_38442998_C_	13	39.6204
Gm13_38554316_C_	13	39.7317
Gm13_38620130_A_	13	39.7971
Gm13_38813781_T_	13	39.9907
Gm13_38840706_A_	13	40.017
Gm13_39567369_T_	13	40.7463
Gm17_3627810_G_A	13	41.3307
Gm17_3709542_G_A	13	41.4124
Gm13_40185451_G_	13	41.6308
Gm13_41136742_G_	13	42.5764
Gm13_41210917_T_	13	42.6506
Gm13_41312689_T_	13	42.7524
Gm13_41365742_T_	13	42.8055
Gm13_41886328_C_	13	43.326
Gm13_42027425_G_	13	43.4671
Gm13_42150006_A_	13	43.5901
Gm13_42868706_C_	13	44.2897
Gm13_43259421_T_	13	44.6831
Gm14_1253814_C_T	14	1.25535
Gm14_1340473_G_T	14	1.34214
Gm14_1436509_G_A	14	1.43818
Gm14_1495353_T_C	14	1.49695
Gm14_1564632_C_T	14	1.56629
Gm14_1613564_T_G	14	1.61523
Gm14_1804116_C_T	14	1.80535
Gm14_1879468_A_C	14	1.87484
Gm14_2131407_C_T	14	2.13188
Gm14_2597934_A_G	14	2.59824
Gm14_2650425_C_T	14	2.65078
Gm14_2762103_T_C	14	2.76244
Gm14_2854797_C_A	14	2.85444
Gm14_3042771_T_C	14	3.04493
Gm14_3157865_C_A	14	3.15996
Gm14_3750971_G_A	14	3.76346
Gm14_4571618_G_A	14	4.65591
Gm14_4770786_C_T	14	4.85637
Gm14_4811528_C_A	14	4.89706
Gm14_4889916_T_C	14	4.97404
Gm14_4956317_G_A	14	5.04075
Gm14_5031070_G_A	14	5.1155
Gm14_5908034_T_C	14	6.01904
Gm14_7064274_A_G	14	7.17219
Gm14_8918021_T_G	14	8.70954
Gm14_9307586_A_G	14	9.09981
Gm14_45138908_T_	14	44.417
Gm14_45186718_A_	14	44.4648
Gm14_45234122_T_	14	44.5122
Gm14_45457682_A_	14	44.7358
Gm14_45637666_A_	14	44.9161
Gm14_46247903_A_	14	45.5265
Gm14_46333107_T_	14	45.6116
Gm14_46384907_G_	14	45.6739
Gm14_46421512_T_	14	45.7105
Gm14_46425097_T_	14	45.7141
Gm14_46426557_T_	14	45.7156
Gm14_46431748_T_	14	45.7207
Gm14_46455905_C_	14	45.7438
Gm14_46513248_G_	14	45.8011
Gm14_46548552_T_	14	45.8364
Gm14_46552561_A_	14	45.8404
Gm14_46968410_T_	14	46.2664
Gm14_47081002_T_	14	46.3754
Gm14_47418167_T_	14	46.7385
Gm14_47991114_C_	14	47.3086
Gm14_48026115_C_	14	47.3435
Gm14_48089424_A_	14	47.4072
Gm14_48129511_T_	14	47.4472
Gm14_48219705_C_	14	47.5381
Gm14_48312276_T_	14	47.6306
Gm14_48535790_T_	14	47.8547
Gm14_48656000_T_	14	47.9749
Gm14_49680135_A_	14	48.0891
Gm14_49564304_T_	14	48.2049
Gm14_49503348_C_	14	48.2659
Gm14_49357738_A_	14	48.4116
Gm14_49199294_C_	14	48.57
Gm14_49107190_G_	14	48.6622
Gm14_48836596_G_	14	48.9328
Gm15_630331_G_A	15	0.629882
Gm15_741627_C_A	15	0.741134
Gm15_756303_T_C	15	0.75581
Gm15_872867_T_G	15	0.872325
Gm15_1128092_G_A	15	1.12739
Gm15_1209819_T_C	15	1.20906
Gm15_1265753_C_T	15	1.26511
Gm15_1349135_T_C	15	1.34844
Gm15_1910769_G_A	15	1.91075
Gm15_2021199_T_C	15	2.02119
Gm15_2072075_A_G	15	2.07212
Gm15_2391075_G_A	15	2.39108
Gm15_2486485_A_G	15	2.48657
Gm15_2624165_G_T	15	2.62432
Gm15_2729636_A_C	15	2.72949
Gm15_2781077_T_C	15	2.78097
Gm15_3281983_G_A	15	3.29143
Gm15_3468596_G_T	15	3.48812
Gm15_3845971_T_C	15	3.86395
Gm15_4264903_C_T	15	4.28378
Gm15_4456903_G_A	15	4.47587
Gm15_4522374_C_A	15	4.54131
Gm15_4973977_T_C	15	4.9919
Gm15_5097389_T_C	15	5.11623
Gm15_5638918_T_G	15	5.65757
Gm15_5924951_A_G	15	5.94396
Gm15_6047557_T_C	15	6.06667
Gm15_6646246_C_T	15	6.6655
Gm15_6674572_A_C	15	6.69382
Gm15_6823009_G_T	15	6.84138
Gm15_6925513_T_C	15	6.93939
Gm15_7023081_G_A	15	7.03696
Gm15_7080649_A_C	15	7.09448
Gm15_7147226_G_A	15	7.16106
Gm15_7574118_T_C	15	7.5983
Gm15_7637174_A_C	15	7.66138
Gm15_7721702_G_A	15	7.74572
Gm15_7864348_G_T	15	7.88834
Gm15_8134735_A_G	15	8.16685
Gm15_8263547_G_T	15	8.30465
Gm15_8412363_G_A	15	8.4533
Gm15_8697425_C_A	15	8.74025
Gm15_8715603_A_G	15	8.75838
Gm15_8815027_T_C	15	8.85801
Gm15_8934427_C_T	15	8.97651
Gm15_9520804_G_A	15	9.6655
Gm15_9733870_T_C	15	9.88761
Gm15_9948537_G_A	15	10.1022
Gm15_10261760_T_	15	10.414
Gm15_10467095_G_	15	10.5457
Gm15_12531884_A_	15	12.553
Gm15_12611331_A_	15	12.6324
Gm15_12643435_T_	15	12.6646
Gm15_12906302_T_	15	12.9256
Gm15_13098003_A_	15	13.117
Gm15_13180039_C_	15	13.1989
Gm15_13257987_T_	15	13.2753
Gm15_13358960_C_	15	13.3763
Gm15_13427310_G_	15	13.441
Gm15_13801080_T_	15	13.8167
Gm15_13828058_G_	15	13.8437
Gm15_13912259_A_	15	13.9279
Gm15_14146264_T_	15	14.1623
Gm15_14201752_T_	15	14.2177
Gm15_14243520_C_	15	14.2594
Gm15_14329774_G_	15	14.3457
Gm15_14361475_T_	15	14.3774
Gm15_14539028_A_	15	14.555
Gm15_14548441_T_	15	14.5645
Gm15_14642145_G_	15	14.6673
Gm15_48061981_C_	15	48.8555
Gm15_48117938_G_	15	48.9115
Gm15_48313076_A_	15	49.1066
Gm15_48727813_T_	15	49.5213
Gm15_49401353_T_	15	50.1947
Gm15_49543373_C_	15	50.3421
Gm15_49560894_T_	15	50.3596
Gm15_49612939_A_	15	50.4117
Gm15_49704201_T_	15	50.5028
Gm15_49779326_T_	15	50.578
Gm15_50430403_T_	15	51.2292
Gm15_50443107_T_	15	51.2419
Gm15_50536934_C_	15	51.3342
Gm15_50626980_T_	15	51.4242
Gm15_50752900_T_	15	51.5538
Gm15_50864537_A_	15	51.6654
Gm16_4034155_A_C	16	4.05457
Gm16_4049924_T_G	16	4.07039
Gm16_4051121_C_T	16	4.07159
Gm16_4053702_G_A	16	4.07417
Gm16_4272398_T_C	16	4.29341
Gm16_4275585_C_T	16	4.29664
Gm16_4278216_T_C	16	4.29922
Gm16_4279385_C_T	16	4.30039
Gm16_4285389_A_G	16	4.30669
Gm16_4286455_T_C	16	4.30776
Gm16_4291370_A_G	16	4.31267
Gm16_4333469_T_G	16	4.36047
Gm16_4337250_G_A	16	4.36425
Gm16_4348006_A_G	16	4.37505
Gm16_4351139_A_C	16	4.37814
Gm16_4353954_C_A	16	4.381
Gm16_4828388_A_G	16	4.85665
Gm16_4845539_C_T	16	4.87375
Gm16_4846461_G_A	16	4.87468
Gm16_4847445_C_T	16	4.87566
Gm16_4903510_T_C	16	4.93173
Gm16_4908430_C_T	16	4.9367
Gm16_4924210_A_G	16	4.95243
Gm16_4936997_G_A	16	4.96521
Gm16_4950614_T_C	16	4.97883
Gm16_4981743_C_T	16	5.00999
Gm16_5005273_G_A	16	5.03348
Gm16_5021984_T_C	16	5.05025
Gm16_5025452_A_C	16	5.05366
Gm16_5027033_C_T	16	5.05524
Gm16_5031425_G_T	16	5.05964
Gm16_5101636_A_G	16	5.1299
Gm16_5105013_T_C	16	5.13322
Gm16_5106885_G_A	16	5.1351
Gm16_5108952_T_C	16	5.13721
Gm16_5114361_A_G	16	5.14257
Gm16_5115135_T_C	16	5.14335
Gm16_5148649_A_G	16	5.17693
Gm16_5220299_A_G	16	5.24857
Gm16_5259121_A_G	16	5.28739
Gm16_6467029_A_G	16	6.61393
Gm16_6483232_C_T	16	6.63013
Gm16_6484276_A_G	16	6.63113
Gm16_6485492_T_C	16	6.63234
Gm16_6504397_A_G	16	6.65125
Gm16_6510537_A_G	16	6.65744
Gm16_6517204_T_C	16	6.66406
Gm16_6559259_C_A	16	6.70609
Gm16_6624879_C_T	16	6.7717
Gm16_6648262_C_A	16	6.79503
Gm16_6680549_G_A	16	6.82738
Gm16_6702694_C_T	16	6.85853
Gm16_6713173_T_G	16	6.86901
Gm16_6716691_G_A	16	6.87098
Gm16_6722816_A_G	16	6.87711
Gm16_6729421_G_A	16	6.88371
Gm16_6730687_C_T	16	6.88503
Gm16_6741992_G_A	16	6.89628
Gm16_6745444_A_G	16	6.89979
Gm16_6748936_A_G	16	6.90323
Gm16_6774822_T_C	16	6.92917
Gm16_6779321_A_G	16	6.93367
Gm16_6780923_T_C	16	6.93522
Gm16_6782977_A_C	16	6.93732
Gm16_6793682_C_T	16	6.94798
Gm16_6840143_G_A	16	6.96498
Gm16_6841022_G_A	16	6.96586
Gm16_6817499_A_C	16	6.97409
Gm16_6850485_A_G	16	7.00821
Gm16_6851535_G_A	16	7.00925
Gm16_6857452_A_G	16	7.01518
Gm16_6868110_C_A	16	7.02626
Gm16_6872462_A_G	16	7.03066
Gm16_7018526_T_C	16	7.17631
Gm16_7407374_G_A	16	7.5658
Gm16_7460429_A_G	16	7.61886
Gm16_7525351_G_A	16	7.68378
Gm16_7636967_C_T	16	7.7955
Gm16_7743486_G_T	16	7.90137
Gm16_7851145_G_A	16	8.00841
Gm16_7947809_A_C	16	8.10379
Gm16_7990029_T_C	16	8.1458
Gm16_8040403_C_T	16	8.19726
Gm16_8415385_G_A	16	8.57184
Gm16_8540188_T_C	16	8.70421
Gm16_8841717_A_G	16	9.00681
Gm16_9244011_A_G	16	9.41388
Gm16_9356529_T_C	16	9.5264
Gm16_10793089_G_	16	10.9618
Gm16_11194677_C_	16	11.3559
Gm16_13657908_C_	16	13.0531
Gm16_13280379_G_	16	13.4302
Gm16_15145964_A_	16	15.281
Gm16_16713042_T_	16	16.8839
Gm16_22474964_T_	16	17.8255
Gm16_20054798_T_	16	20.2586
Gm16_18732921_A_	16	21.5804
Gm16_22937295_T_	16	23.2456
Gm16_23995972_G_	16	24.3468
Gm16_24329186_A_	16	24.6801
Gm16_24389823_A_	16	24.7396
Gm16_24612301_A_	16	24.9622
Gm16_24793404_C_	16	25.1434
Gm16_25127133_A_	16	25.4807
Gm16_25378270_A_	16	25.7317
Gm16_26324517_C_	16	26.6704
Gm16_26824305_C_	16	27.1692
Gm16_27092931_A_	16	27.4376
Gm16_27521057_G_	16	27.8642
Gm16_27750410_T_	16	28.1027
Gm16_27978857_A_	16	28.331
Gm16_28266706_T_	16	28.6285
Gm16_28443553_T_	16	28.7988
Gm16_29164813_G_	16	29.5317
Gm16_29171255_A_	16	29.5382
Gm16_29173309_T_	16	29.5402
Gm16_29175522_G_	16	29.5425
Gm16_29177126_G_	16	29.544
Gm16_29930067_A_	16	30.2676
Gm16_29985920_A_	16	30.3539
Gm16_30038668_G_	16	30.4066
Gm16_30108889_C_	16	30.4764
Gm16_30151465_A_	16	30.5195
Gm16_30228382_A_	16	30.5963
Gm16_30369809_T_	16	30.738
Gm16_30418735_C_	16	30.7868
Gm16_30456714_T_	16	30.8248
Gm16_30597214_G_	16	30.9651
Gm16_30651025_A_	16	31.0193
Gm16_31161985_G_	16	31.5304
Gm16_31710278_G_	16	32.0786
Gm09_6106747_G_T	16	32.2056
Gm16_31787658_T_	16	32.2681
Gm16_31837545_C_	16	32.318
Gm16_32200441_A_	16	32.6986
Gm16_32274336_C_	16	32.7724
Gm16_32340079_G_	16	32.8382
Gm16_32665742_T_	16	33.1672
Gm16_32876100_A_	16	33.3512
Gm16_33210540_T_	16	33.7013
Gm16_33457667_T_	16	33.9547
Gm16_33549185_T_	16	34.0463
Gm16_33957659_G_	16	34.4596
Gm16_34685922_G_	16	35.1864
Gm16_35135922_T_	16	35.6339
Gm16_35148803_T_	16	35.6467
Gm16_35257348_T_	16	35.7609
Gm16_35643452_C_	16	36.1467
Gm16_35738081_A_	16	36.2409
Gm16_35933600_A_	16	36.4365
Gm16_35973543_G_	16	36.4764
Gm16_36218124_A_	16	36.721
Gm16_36271795_C_	16	36.7746
Gm16_36413821_C_	16	36.9166
Gm16_36583867_G_	16	37.0866
Gm16_36983033_C_	16	37.4759
Gm16_37161151_A_	16	37.6536
Gm17_361061_G_A	17	0.35789
Gm17_504609_A_C	17	0.501461
Gm17_534037_T_C	17	0.530889
Gm17_714916_G_A	17	0.7086
Gm17_794264_C_T	17	0.787999
Gm17_910402_T_G	17	0.904135
Gm17_986489_T_C	17	0.980222
Gm17_1093503_C_T	17	1.08723
Gm17_1300698_A_G	17	1.29447
Gm17_1918529_T_C	17	1.91216
Gm17_2009159_A_G	17	2.00279
Gm17_2161335_A_G	17	2.15502
Gm17_2224271_C_T	17	2.21801
Gm17_2581266_T_C	17	2.5735
Gm17_2637958_C_T	17	2.63019
Gm17_2808530_G_T	17	2.80081
Gm17_2899237_G_A	17	2.89147
Gm17_3126540_C_T	17	3.11882
Gm17_3320209_G_A	17	3.31247
Gm17_4039342_A_G	17	3.76875
Gm17_4127957_T_C	17	3.85731
Gm17_4216767_G_A	17	3.94637
Gm17_4312738_C_T	17	4.04228
Gm17_5294475_T_C	17	5.02701
Gm17_5384624_A_C	17	5.11711
Gm17_5437401_T_C	17	5.16989
Gm17_5690186_C_T	17	5.42264
Gm17_5887651_A_G	17	5.62038
Gm17_5982607_A_C	17	5.71829
Gm17_6090553_C_T	17	5.82607
Gm17_6153400_T_C	17	5.88897
Gm17_6778459_T_G	17	6.51398
Gm17_6999193_T_C	17	6.73469
Gm17_7044158_A_G	17	6.77965
Gm17_7162023_T_C	17	6.89738
Gm17_7280661_C_T	17	7.01583
Gm17_7368164_A_G	17	7.09917
Gm17_7461701_A_C	17	7.19265
Gm17_7586797_T_C	17	7.31631
Gm17_7756014_C_T	17	7.48698
Gm17_7887554_T_C	17	7.61813
Gm17_7987599_C_A	17	7.71813
Gm17_8194356_C_T	17	7.92494
Gm17_8563621_G_A	17	8.2924
Gm17_8939133_A_G	17	8.66857
Gm17_9065734_G_A	17	8.7949
Gm17_9191781_T_C	17	8.92091
Gm17_9346364_C_A	17	9.07557
Gm17_9590152_T_G	17	9.31974
Gm17_9608605_C_A	17	9.3382
Gm17_9684872_T_C	17	9.39978
Gm17_9853877_T_G	17	9.5675
Gm17_10106704_C_	17	9.82003
Gm17_10809876_G_	17	10.5237
Gm17_10876251_A_	17	10.5902
Gm17_11359322_G_	17	11.081
Gm17_11915787_T_	17	11.6367
Gm17_12210561_A_	17	11.9396
Gm17_13253012_A_	17	12.9907
Gm17_13349399_G_	17	13.087
Gm17_13487812_A_	17	13.2254
Gm17_13660920_C_	17	13.3986
Gm17_13722544_A_	17	13.4603
Gm17_13858247_A_	17	13.6049
Gm17_14083496_A_	17	13.8314
Gm17_14418215_A_	17	14.1669
Gm17_14439502_G_	17	14.1882
Gm17_15493313_G_	17	15.2583
Gm17_15872822_C_	17	15.6372
Gm17_18586619_C_	17	18.2323
Gm17_19126049_T_	17	18.7907
Gm17_20787666_A_	17	20.4546
Gm17_24474211_A_	17	24.0945
Gm17_25294261_G_	17	24.9253
Gm17_27791091_G_	17	27.3833
Gm17_28538552_C_	17	28.2039
Gm17_31111789_G_	17	30.8154
Gm17_31544109_C_	17	31.2468
Gm17_32367167_G_	17	32.0373
Gm17_32625352_A_	17	32.2959
Gm17_32801147_T_	17	32.4715
Gm17_33343495_A_	17	33.0086
Gm17_33637862_T_	17	33.2966
Gm17_33800042_A_	17	33.4599
Gm17_34420978_G_	17	34.0884
Gm17_34718456_A_	17	34.3866
Gm17_34798386_C_	17	34.4669
Gm17_36382955_A_	17	36.0933
Gm17_36453965_A_	17	36.1645
Gm17_36544388_G_	17	36.2539
Gm17_36684149_A_	17	36.3938
Gm17_36782012_T_	17	36.4917
Gm17_37204244_A_	17	36.9138
Gm17_37228278_T_	17	36.9378
Gm17_37335550_T_	17	37.0468
Gm17_37391436_C_	17	37.1027
Gm03_13245008_C_	17	37.1398
Gm17_37574384_T_	17	37.2849
Gm17_37682996_T_	17	37.3935
Gm17_37769727_A_	17	37.4802
Gm17_37989202_C_	17	37.6971
Gm17_38051554_A_	17	37.7595
Gm17_38361476_G_	17	38.0693
Gm17_38465611_G_	17	38.1735
Gm17_38601758_G_	17	38.3097
Gm17_38647180_T_	17	38.3548
Gm17_38649423_A_	17	38.357
Gm17_38766156_T_	17	38.4734
Gm17_39702186_T_	17	39.4266
Gm17_39797024_C_	17	39.5215
Gm17_39804515_T_	17	39.529
Gm17_39948312_A_	17	39.6727
Gm17_40335241_A_	17	40.0683
Gm17_41063513_T_	17	40.7967
Gm17_41674343_A_	17	41.408
Gm18_298221_T_C	18	0.298237
Gm18_347275_C_A	18	0.347291
Gm18_665101_T_G	18	0.665416
Gm18_747510_C_A	18	0.747825
Gm18_829765_C_A	18	0.83008
Gm18_963047_A_G	18	0.963409
Gm18_1158628_A_G	18	1.15894
Gm18_1235422_T_C	18	1.23573
Gm18_1286527_A_G	18	1.28684
Gm18_1362173_C_A	18	1.36252
Gm18_1388493_C_T	18	1.38889
Gm18_1451362_A_G	18	1.45176
Gm18_1459828_C_A	18	1.46018
Gm18_1479510_T_C	18	1.47986
Gm18_1517592_A_G	18	1.51799
Gm18_1548805_C_T	18	1.54915
Gm18_1552671_A_G	18	1.55307
Gm18_1663298_A_G	18	1.66376
Gm18_1671483_A_G	18	1.67189
Gm18_1674972_C_T	18	1.67543
Gm18_1682082_A_G	18	1.68249
Gm18_1690566_A_G	18	1.69098
Gm18_1699011_T_C	18	1.69947
Gm18_1701594_C_T	18	1.70206
Gm18_1709751_G_A	18	1.71016
Gm18_1712832_T_C	18	1.71329
Gm18_1718002_G_A	18	1.71846
Gm18_1726316_T_G	18	1.72678
Gm18_1737465_T_C	18	1.73788
Gm18_1745477_T_C	18	1.74589
Gm18_1844202_G_A	18	1.84468
Gm18_1848675_G_A	18	1.84918
Gm18_1861988_T_C	18	1.86249
Gm18_1909453_T_C	18	1.90996
Gm18_2070051_A_G	18	2.07055
Gm18_2155134_C_T	18	2.15569
Gm18_2158248_T_C	18	2.1588
Gm18_2178121_C_T	18	2.17862
Gm18_2220964_T_C	18	2.22152
Gm18_2228646_C_T	18	2.22915
Gm18_2357279_C_T	18	2.36681
Gm18_2438838_A_G	18	2.44844
[truncated: 320 more rows]
